# Supplementary material for: Density functional theory and microkinetics of ethylene chain growth and termination on silica grafted group 4 metal hydrides
Source: Royal Society of Chemistry journal article supplement (doi:10.1039/d4cy00684d), 2024-01-01
Supplement: d4cy00684d1.pdf [file d4cy00684d1.pdf]

## Supplementary Information

### **Density functional theory and microkinetics of ethylene chain growth and termination on silica grafted group 4 metal hydrides**

Neha Mehra and William F. Schneider\*

*Department of Chemical and Biomolecular Engineering, University of Notre Dame, Notre Dame, Indiana 46556, United States*

\*E-mail: [wschneider@nd.edu](mailto:w Schneider@nd.edu)

## Table of Contents

|                                                                                   |           |
|-----------------------------------------------------------------------------------|-----------|
| <b>Multi-product reaction cycle and assumptions .....</b>                         | <b>3</b>  |
| <b>Raw gas molecule energies .....</b>                                            | <b>4</b>  |
| <b>Silica surfaces representations .....</b>                                      | <b>4</b>  |
| <b>Grafting and hydrogenolysis of <math>M(CH_3)_4</math> to 3-4mr site .....</b>  | <b>5</b>  |
| <b>3-4mr oligomerization intermediates and reactions .....</b>                    | <b>10</b> |
| <b>3-4mr transition state distortions.....</b>                                    | <b>16</b> |
| <b>Entropy models.....</b>                                                        | <b>17</b> |
| <b>3-4mr free energy surfaces.....</b>                                            | <b>18</b> |
| <b>3-4mr microkinetic models.....</b>                                             | <b>20</b> |
| <b>Degree of Polymerization (<math>P_n</math>) .....</b>                          | <b>21</b> |
| Low pressure and temperature rates and $P_n$ for Zr site models.....              | 22        |
| <b>Grafting and hydrogenolysis of <math>Zr(CH_3)_4</math> to 3-3mr site .....</b> | <b>24</b> |
| <b>3-3mr oligomerization intermediates and reactions .....</b>                    | <b>27</b> |
| <b>3-3mr transition state distortions.....</b>                                    | <b>30</b> |
| <b>3-3mr microkinetic model .....</b>                                             | <b>31</b> |
| <b>Grafting and hydrogenolysis of <math>M(CH_3)_4</math> to 1-3mr site .....</b>  | <b>34</b> |
| <b>1-3mr oligomerization intermediates and reactions .....</b>                    | <b>36</b> |
| <b>1-3mr microkinetic models.....</b>                                             | <b>41</b> |
| <b>References .....</b>                                                           | <b>42</b> |

## Multi-product reaction cycle and assumptions

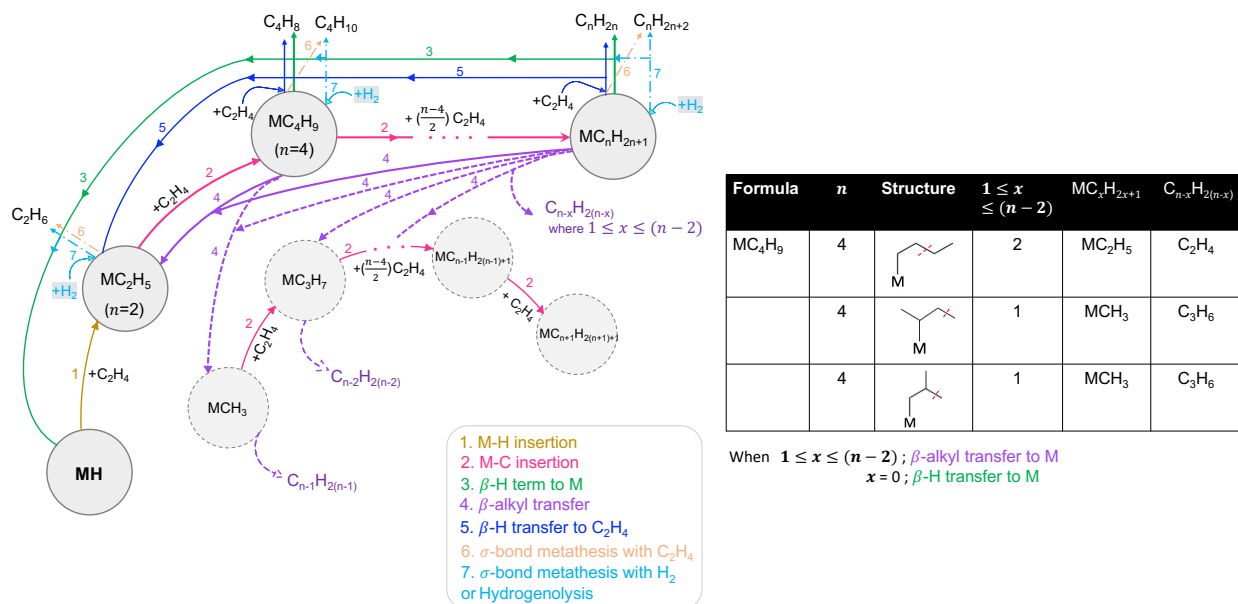

**Scheme S1:** Schematic summary of reactions relevant to ethylene ( $C_2H_4$ ) oligomerization on MH ( $M$ =metal ion) sites, color coded by reaction type. Surface sites are enclosed in bubbles. Solid circular bubble on bottom left: insertion of ethylene into M-H (1) forms  $MC_2H_5$  that proceeds to form linear chained  $MC_4H_9$  by ethylene insertion into M-C bond (2), leading to chain growth by C-C bond formation.  $\beta$ -H elimination to M (3) or to an ethylene monomer (5), or  $\beta$ -alkyl transfer to metal (4), all lead to olefin.  $\sigma$ -bond metathesis with ethylene (6) or with  $H_2$  (7) yields saturated products and either generates M-vinyl that can undergo ethylene insertion to form alkylidene chains (not shown here) or restores the M-H site.

Secondary reactions of olefins begin by reinsertion at an internal olefinic carbon. Repeated termination-insertion steps result in chain-walking, and through  $\beta$ -alkyl transfer (table shows possibilities for  $MC_4H_9$ ), to odd-numbered C chains or their surface sites (dashed bubbles).

Microkinetic models assume that rate constants for the 7 distinct reaction types are independent of the chain length. Further, we neglect the contributions of reinsertion reactions, thus assuming that transport from active sites is more rapid than reinsertion reactions.

## Raw gas molecule energies

**Table S1:** PBE computed ( $E^{\text{DFT}}$ ) and zero-point ( $E^{\text{ZPE}}$ ) energies in eV for gas molecules enclosed in  $15\text{\AA} \times 15\text{\AA} \times 15\text{\AA}$  cell

|                                       | $E^{\text{DFT}}$ | $E^{\text{ZPE}}$ |
|---------------------------------------|------------------|------------------|
| Ethene ( $\text{C}_2\text{H}_4$ )     | -31.971          | 1.359            |
| 1-Butene ( $1\text{-C}_4\text{H}_8$ ) | -65.179          | 2.884            |
| Ethane ( $\text{C}_2\text{H}_6$ )     | -40.494          | 1.989            |
| Methane ( $\text{CH}_4$ )             | -24.031          | 1.188            |
| Hydrogen ( $\text{H}_2$ )             | -6.760           | 0.272            |
| Water ( $\text{H}_2\text{O}$ )        | -14.222          | 0.573            |
| $\text{Si}(\text{OH})_4$              | -52.020          | 1.531            |
| $\text{Ti}(\text{CH}_3)_4$            | -86.542          | 3.605            |
| $\text{Zr}(\text{CH}_3)_4$            | -87.462          | 3.584            |
| $\text{Hf}(\text{CH}_3)_4$            | -89.322          | 3.592            |

## Silica surfaces representations

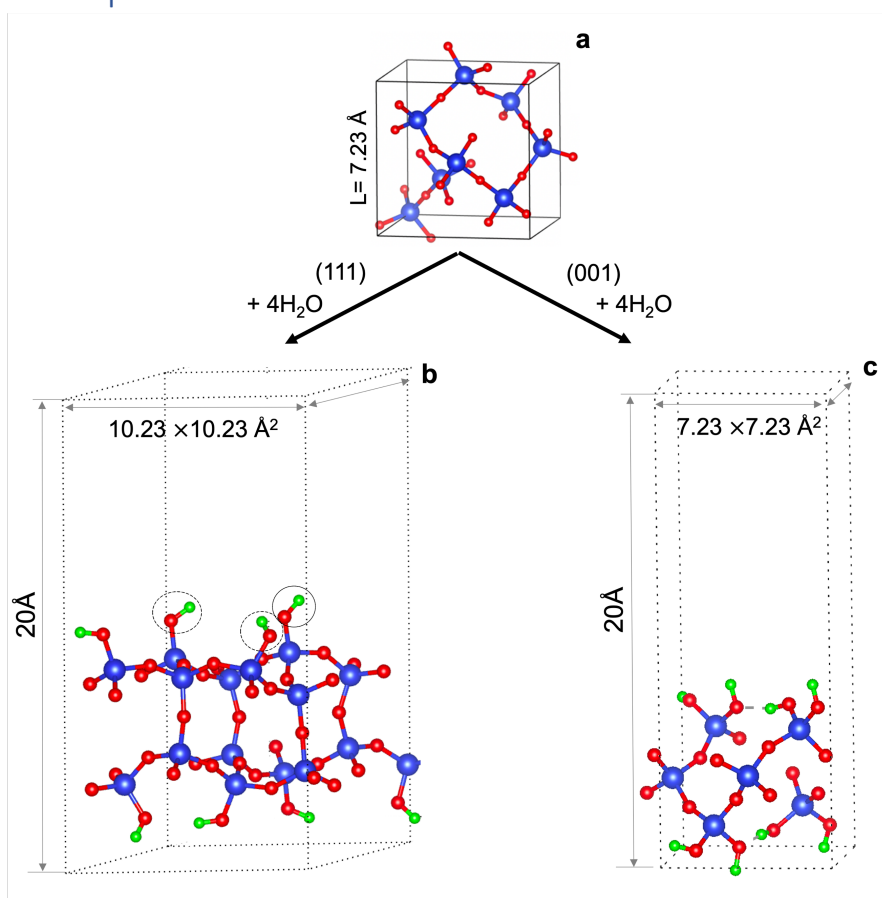

**Fig. S1:** a) Bulk  $\beta$ -cristobalite<sup>1</sup> unit cell b) (111) silica surface having 4 OH groups on top surface c) (001) silica surface with geminal silanols (two OH groups on a Si). Atoms are colored as H in green (●), O in red (●), Si in blue (●).

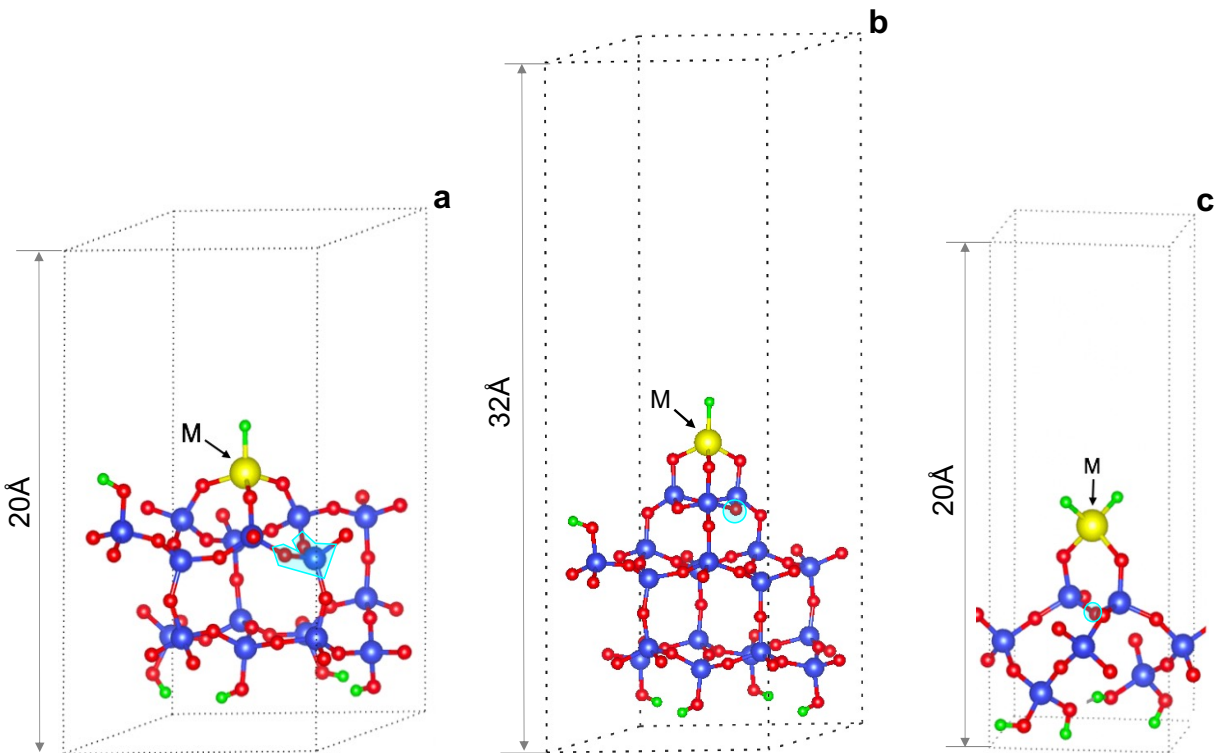

**Fig. S2:** **a)** 3-4mr ( $\equiv\text{SiO}$ )<sub>3</sub>MH on (111) silica **b)** 3-3mr ( $\equiv\text{SiO}$ )<sub>3</sub>MH on reconstructed (111) silica **c)** 1-3mr ( $\equiv\text{SiO}$ )<sub>2</sub>MH<sub>2</sub> on dehydroxylated (001) surface. Linkages separating the M-O-Si bonds are marked in light blue shade.

### Grafting and hydrogenolysis of $\text{M}(\text{CH}_3)_4$ to 3-4mr site

Grafting is performed with the precursor  $\text{M}(\text{CH}_3)_4$  on silanols of silica surface. The sequential reactions leading to formation of  $\text{M}(\text{IV})$  hydrides are presented in reaction (s1) and reaction (s2) where  $n=1,2$  or 3 for silica (111). The goal is to compare the relative stabilities of these species and not to reproduce the actual grafting process where breaking of strained siloxane ( $\equiv\text{Si-O-Si}\equiv$ ) bridges and generation of silicon hydrides  $\text{Si-H}_x$  accompany the formation of  $\text{M}(\text{IV})$ -hydrides.

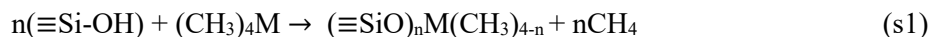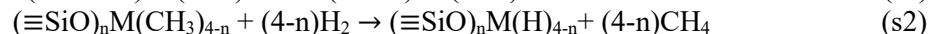

Structures of  $(\equiv\text{SiO})_n\text{M}(\text{CH}_3)_{4-n}$ , obtained from reaction (s1) are in Fig. S3 and their energies in Table S2. Thermodynamics associated with the sequential loss of methyl ligand as the metal ion anchors to single silanols of silica (111) is shown for  $\text{Zr}^{4+}$  ion in Fig. S4(a). A parity plot comparing heats of grafting (listed in Table S3) for  $(\equiv\text{SiO})_n\text{M}(\text{CH}_3)_{4-n}$  complexes over (111) surface for the three metal ions against Zr's is shown in Fig. S4(b). The heats of grafting are in the order of  $\text{Hf} < \text{Zr} < \text{Ti}$  and are exothermic. This is in line with M-O and M-C bond energies reported in literature<sup>2</sup> (Table S4).

Hydrogenolysis of  $(\equiv\text{SiO})_n\text{Zr}(\text{CH}_3)_{4-n}$  complexes to their corresponding hydrides  $(\equiv\text{SiO})_n\text{Zr}(\text{H})_{4-n}$  (structures in Fig. S5) as per reaction (s2) is exothermic (Table S3). Hydrogenolysis energy varies non-periodically across metal ions as  $\text{Ti} > \text{Zr} < \text{Hf}$ . The H-bonding between the M-hydride and  $\text{H}^+$  of  $\equiv\text{SiOH}$  in the vicinity, enhances the stability of  $(\equiv\text{SiO})\text{M}(\text{H})_3$  and  $(\equiv\text{SiO})_2\text{M}(\text{H})_2$ , while such an interaction is not there in  $(\equiv\text{SiO})_3\text{M}(\text{H})$  (Fig. S5). Overall, this indicates that supported organic complexes of Group-4 metals when pre-treated with hydrogen will convert to hydrides that have higher coordination to support as reported by experimental characterizations.

**Table S2:** PBE computed  $E^{DFT}$  (without ZPE correction) energies in eV for structures in grafting and hydrogenolysis reactions on (111) silica of Fig. S1b

| Species                                       | Ti       | Zr       | Hf       |
|-----------------------------------------------|----------|----------|----------|
| $(\equiv\text{SiO})\text{M}(\text{CH}_3)_3$   | -501.691 | -502.706 | -504.678 |
| $(\equiv\text{SiO})_2\text{M}(\text{CH}_3)_2$ | -479.322 | -480.612 | -482.615 |
| $(\equiv\text{SiO})_3\text{M}(\text{CH}_3)$   | -456.819 | -458.182 | -460.223 |
| $(\equiv\text{SiO})\text{M}(\text{H})_3$      | -450.350 | -451.514 | -453.406 |
| $(\equiv\text{SiO})_2\text{M}(\text{H})_2$    | -445.390 | -446.626 | -448.612 |
| $(\equiv\text{SiO})_3\text{M}(\text{H})$      | -439.705 | -441.116 | -443.153 |
| Clean Silica slab                             |          | -437.004 |          |

**Table S3:** DFT computed heats of grafting  $(\text{CH}_3)_4\text{M}$  in eV on silica (111) surface using energies from Table S2

| M         | Grafting $\text{M}(\text{CH}_3)_4$ on silica (111) |       |       | Hydrogenolysis of grafted $(\equiv\text{SiO})_n\text{M}(\text{CH}_3)_{4-n}$ |       |       |
|-----------|----------------------------------------------------|-------|-------|-----------------------------------------------------------------------------|-------|-------|
|           | Calculated by reaction (s1)                        |       |       | Calculated by reaction (s2)                                                 |       |       |
|           | n=1                                                | n=2   | n=3   | n=1                                                                         | n=2   | n=3   |
| <b>Ti</b> | -2.18                                              | -3.84 | -5.37 | -0.47                                                                       | -0.61 | -0.16 |
| <b>Zr</b> | -2.27                                              | -4.21 | -5.81 | -0.62                                                                       | -0.56 | -0.21 |
| <b>Hf</b> | -2.38                                              | -4.35 | -5.99 | -0.54                                                                       | -0.54 | -0.20 |

**Table S4:** M-C and M-O bond energy trends for Ti, Zr and Hf compounds from literature.<sup>2</sup> Energies in kcal/mol

| Bond        | Compounds from reference                | Bond Energies <sup>2</sup> | Average Energy of M-O, M-C bonds | (M-O)-(M-C) |
|-------------|-----------------------------------------|----------------------------|----------------------------------|-------------|
| <b>Ti-C</b> | $\text{Ti}(\text{CH}_2\text{CMe}_3)_4$  | 44                         | 57                               | 55          |
|             | $\text{Ti}(\text{CH}_2\text{SiMe}_3)_4$ | 64                         |                                  |             |
|             | $\text{Ti}(\text{CH}_2\text{Ph})_4$     | 63                         |                                  |             |
| <b>Ti-O</b> | $\text{Ti}(\text{OPr}^i)_4$             | 112                        | 112                              |             |
| <b>Zr-C</b> | $\text{Zr}(\text{CH}_2\text{CMe}_3)_4$  | 54                         | 68                               | 68          |
|             | $\text{Zr}(\text{CH}_2\text{SiMe}_3)_4$ | 75                         |                                  |             |
|             | $\text{Zr}(\text{CH}_2\text{Ph})_4$     | 74                         |                                  |             |
| <b>Zr-O</b> | $\text{Zr}(\text{OPr}^i)_4$             | 136                        | 136                              |             |
| <b>Hf-C</b> | $\text{Hf}(\text{CH}_2\text{CMe}_3)_4$  | 58                         | 58                               | 79          |
| <b>Hf-O</b> | $\text{Hf}(\text{OPr}^i)_4$             | 137                        | 137                              |             |

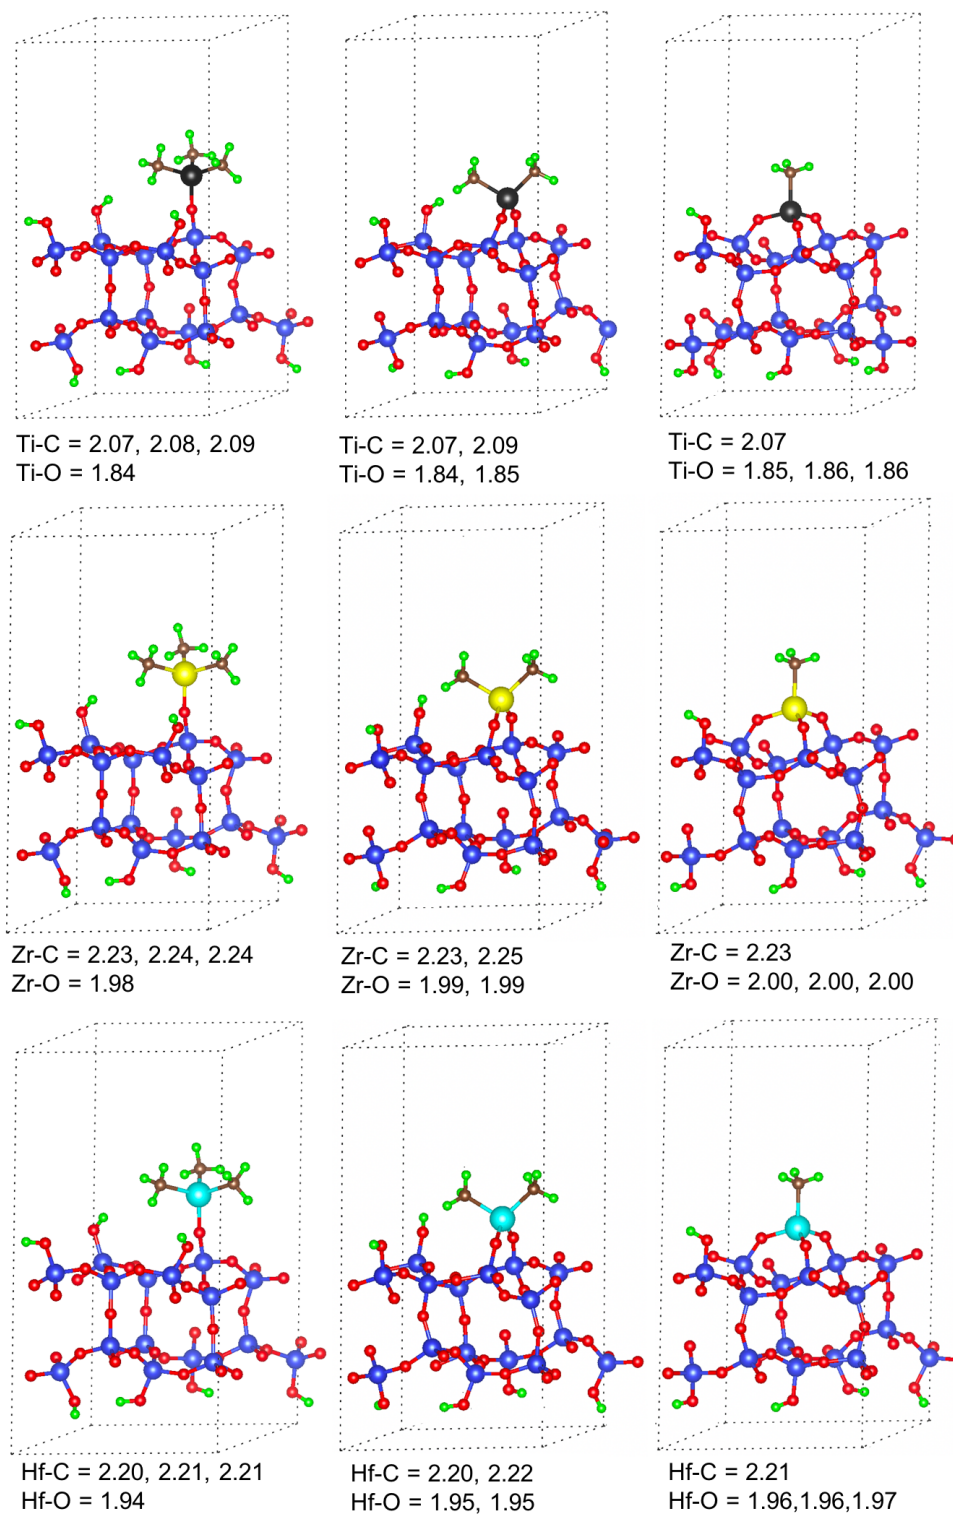

**Fig. S3:** Structures of  $(\equiv\text{SiO})_n\text{M}(\text{CH}_3)_{4-n}$  on silica(111). Top row for  $\text{M}=\text{Ti}$ , second row for  $\text{M}=\text{Zr}$ , and third row for  $\text{M}=\text{Hf}$  with  $n = 1, 2, 3$  (from left to right). Atoms are colored as H: green, C: brown, O: red, Si: blue, Ti: black (●), Zr: yellow (●), Hf: cyan (light blue, ●). All distances in Å. CONTCARs in Zenodo.<sup>11</sup>

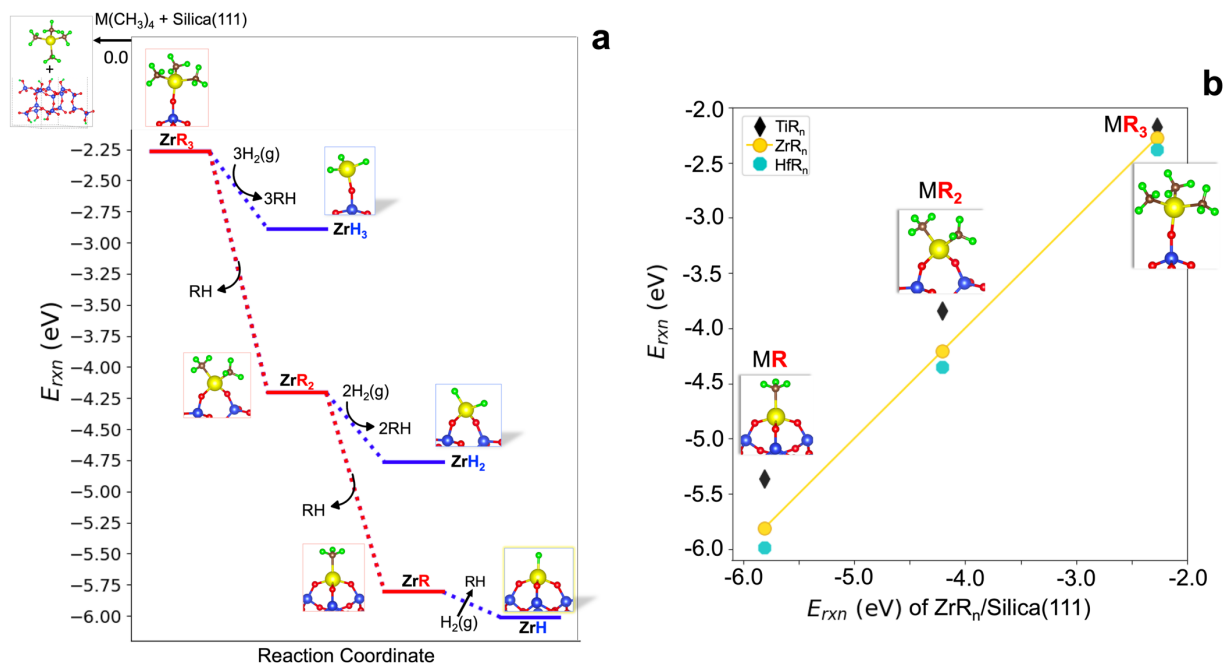

**Fig. S4 a)** Heats of formation of  $(\equiv SiO)_n Zr(CH_3)_{4-n}$  ( $R = CH_3$ ) and  $(\equiv SiO)_n Zr(H)_{4-n}$  on silica (111) [ $n = 1, 2, 3$ ] **b)** Parity plot comparing heats of formation of  $(\equiv SiO)_n M(CH_3)_{4-n}$  for Ti, Zr and Hf on silica (111) against  $(\equiv SiO)_n Zr(CH_3)_{4-n}$ .

**Table S5:** Comparison of wavenumbers ( $cm^{-1}$ ) of M-H bond stretching for 3-4mr monohydride,  $(\equiv SiO)_3 M(H)$  sites to the experimentally reported values

|                     | <b>TiH</b>                                                         | <b>ZrH</b>          | <b>HfH</b>        |
|---------------------|--------------------------------------------------------------------|---------------------|-------------------|
| <b>DFT</b>          | 1756                                                               | 1689                | 1725              |
| <b>Experimental</b> | 1706, 1692, 1679, and 1647, <sup>9</sup><br>1600-1725 <sup>3</sup> | 1633 <sup>4,5</sup> | 1701 <sup>6</sup> |



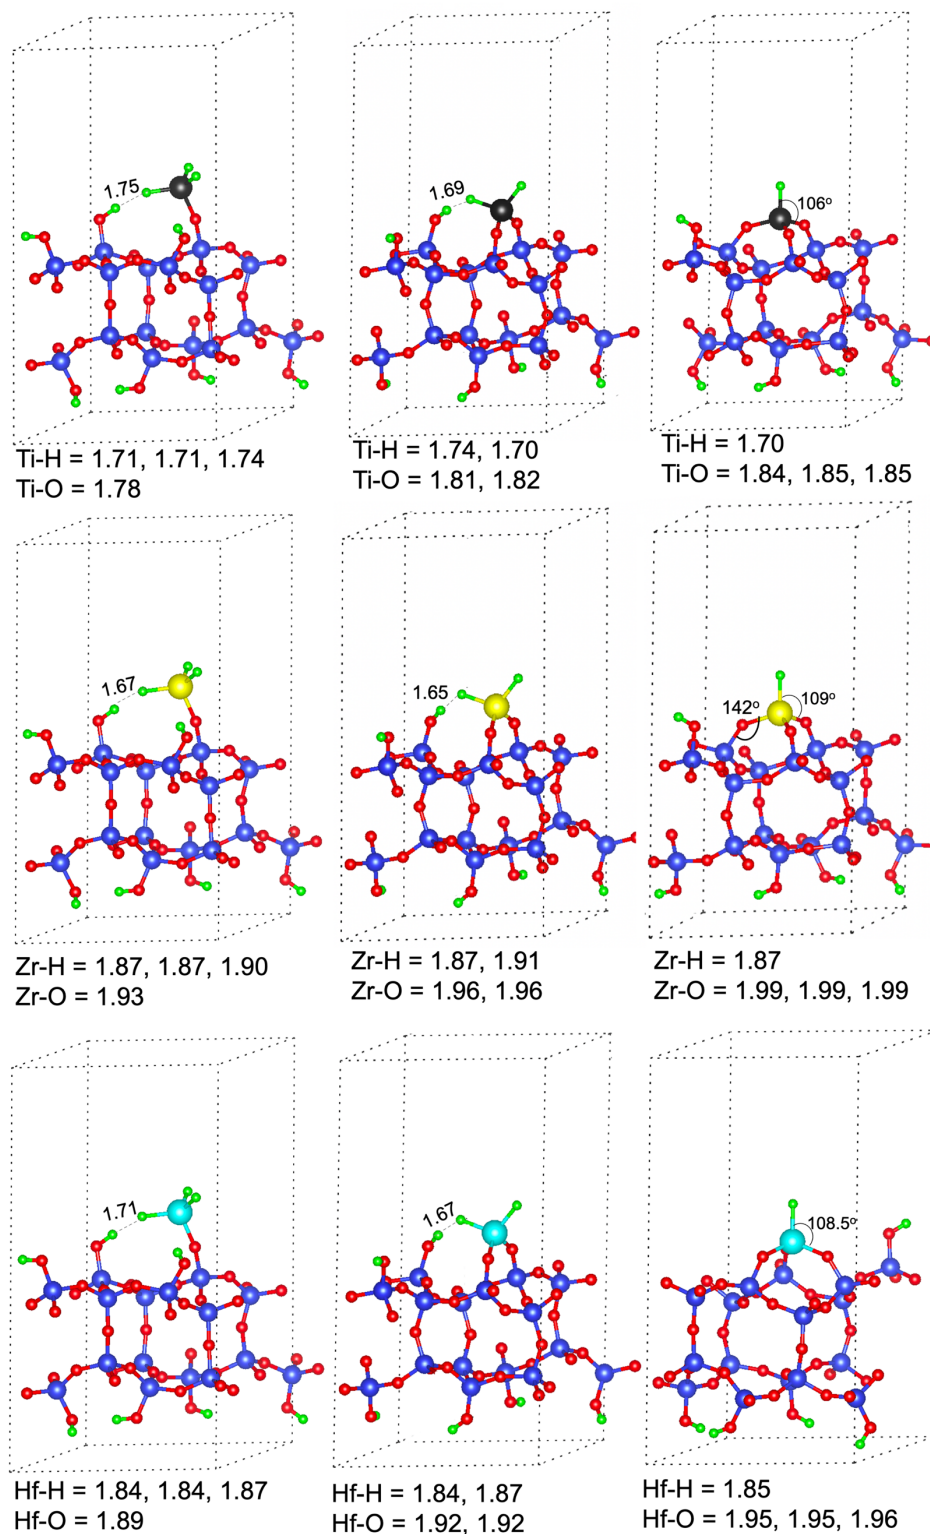

**Fig. S5:** Structures of  $(\equiv\text{SiO})_n\text{M}(\text{H})_{4-n}$  on (111) silica. Top row for  $\text{M}=\text{Ti}$ , second row for  $\text{M}=\text{Zr}$ , and third row for  $\text{M}=\text{Hf}$  with  $n = 1, 2, 3$  (from left to right). Atoms are colored as H: green, O: red, Si: blue, Ti: black (●), Zr: yellow (●), Hf: cyan (light blue, ●). All distances in Å. CONTCARs in Zenodo.<sup>11</sup>

### 3-4mr oligomerization intermediates and reactions

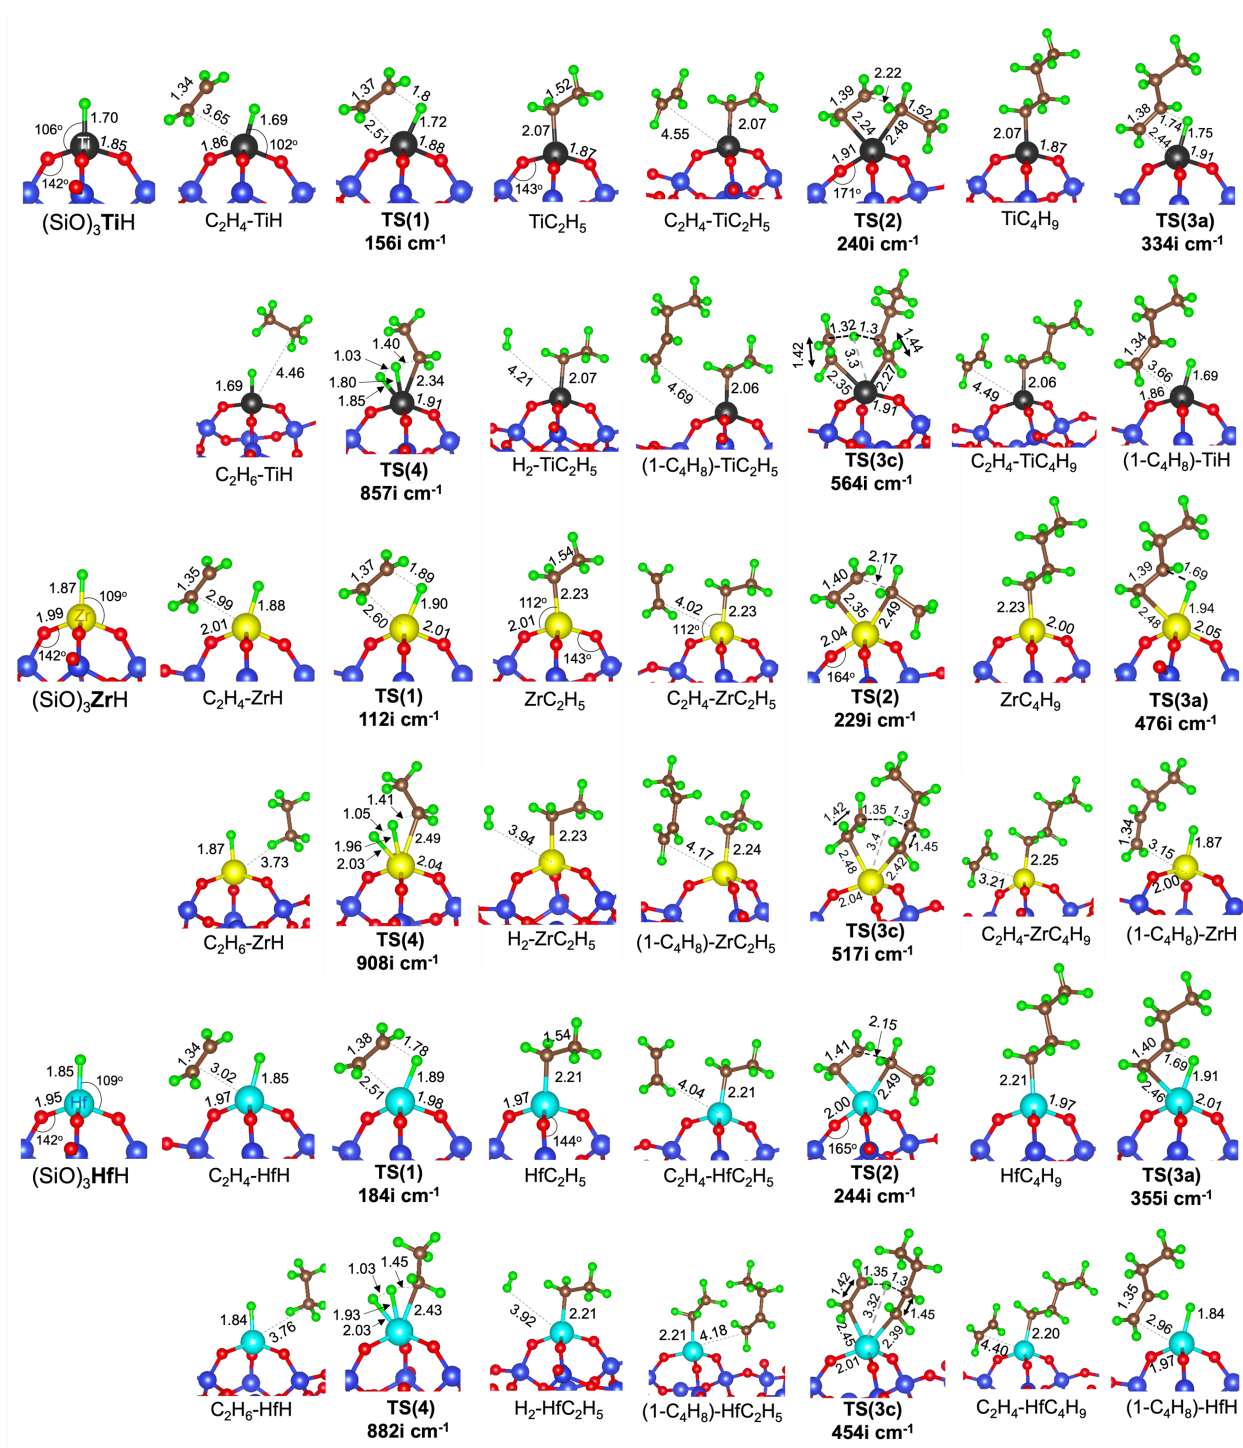

**Fig. S6:** Geometries of species formed along pathways shown in Fig. 2 on 3-4mr ( $\equiv\text{SiO}$ )<sub>3</sub>MH site on periodic (111) silica surface. Top two rows show species for ( $\equiv\text{SiO}$ )<sub>3</sub>TiH, followed by two rows of ( $\equiv\text{SiO}$ )<sub>3</sub>ZrH species and the last two rows for ( $\equiv\text{SiO}$ )<sub>3</sub>HfH species. Bond distances in Å and angles in degrees (°). CONTCARS in Zenodo.<sup>11</sup>

**Table S6:** M-O bond distances and O-M-O bond angles of intermediates formed along the  $2\text{C}_2\text{H}_4 \rightarrow \text{C}_4\text{H}_8$  pathway on  $3\text{-}4\text{mr}$  ( $\equiv\text{SiO}$ )<sub>3</sub>MH site.  $\overline{M-O}$  and  $\overline{\angle\text{OMO}}$  are average distances and angles, respectively. Dihedral angle for transition state is between the atoms in which bond is formed or broken

| Species                                                        | M-O (Å) |      |      | $\overline{M-O}$<br>(Å) | M-H or<br>M-C(Å) | $\angle\text{O-M-O}$ (°) |         |         | $\overline{\angle\text{OMO}}$<br>(°) | $\angle\text{Dihedral}$<br>(°) |
|----------------------------------------------------------------|---------|------|------|-------------------------|------------------|--------------------------|---------|---------|--------------------------------------|--------------------------------|
|                                                                | M-O1    | M-O2 | M-O3 |                         |                  | O1-M-O2                  | O2-M-O3 | O3-M-O1 |                                      |                                |
| <b>Ti-H</b>                                                    | 1.84    | 1.85 | 1.85 | 1.85                    | 1.7              | 112.4                    | 112.8   | 112.5   | 112.6                                |                                |
| <b>Zr-H</b>                                                    | 1.99    | 1.99 | 1.99 | 1.99                    | 1.87             | 109.5                    | 110.3   | 109.8   | 109.9                                |                                |
| <b>Hf-H</b>                                                    | 1.95    | 1.95 | 1.96 | 1.95                    | 1.85             | 110                      | 110.9   | 110.4   | 110.4                                |                                |
| <b>C<sub>2</sub>H<sub>4</sub>-TiH</b>                          | 1.84    | 1.86 | 1.85 | 1.85                    | 1.69             | 111.7                    | 113.2   | 112.2   | 112.4                                |                                |
| <b>C<sub>2</sub>H<sub>4</sub>-ZrH</b>                          | 2       | 2    | 2.01 | 2.00                    | 1.88             | 104.8                    | 105.5   | 113.7   | 108.0                                |                                |
| <b>C<sub>2</sub>H<sub>4</sub>-HfH</b>                          | 1.97    | 1.96 | 1.98 | 1.97                    | 1.85             | 105.1                    | 105.8   | 113.3   | 108.1                                |                                |
| <b>TS1_Ti</b>                                                  | 1.87    | 1.87 | 1.88 | 1.87                    | 1.72             | 105.4                    | 105.4   | 118.4   | 109.7                                | 4.7<br>(Ti-C-C-H)              |
| <b>TS1_Zr</b>                                                  | 2       | 2.01 | 2.01 | 2.01                    | 1.9              | 103.7                    | 104.1   | 114     | 107.3                                | 4.1<br>(Zr-C-C-H)              |
| <b>TS1_Hf</b>                                                  | 1.97    | 1.97 | 1.99 | 1.98                    | 1.89             | 103.7                    | 103.8   | 114     | 107.2                                | 3.9<br>(Hf-C-C-H)              |
| <b>TiC<sub>2</sub>H<sub>5</sub></b>                            | 1.85    | 1.86 | 1.87 | 1.86                    | 2.07*            | 112.3                    | 113.3   | 112.9   | 112.8                                |                                |
| <b>ZrC<sub>2</sub>H<sub>5</sub></b>                            | 1.99    | 2    | 2.01 | 2.00                    | 2.23*            | 110.9                    | 111.6   | 110.5   | 111.0                                |                                |
| <b>HfC<sub>2</sub>H<sub>5</sub></b>                            | 1.96    | 1.97 | 1.97 | 1.97                    | 2.21*            | 111.5                    | 110.7   | 110.3   | 110.8                                |                                |
| <b>C<sub>2</sub>H<sub>4</sub>-TiC<sub>2</sub>H<sub>5</sub></b> | 1.86    | 1.87 | 1.86 | 1.86                    | 2.07             | 113.0                    | 112.2   | 113.4   | 112.9                                |                                |
| <b>C<sub>2</sub>H<sub>4</sub>-ZrC<sub>2</sub>H<sub>5</sub></b> | 2.01    | 1.99 | 2.0  | 2.0                     | 2.23             | 110.9                    | 109.7   | 110.7   | 110.4                                |                                |
| <b>C<sub>2</sub>H<sub>4</sub>-HfC<sub>2</sub>H<sub>5</sub></b> | 1.97    | 1.96 | 1.97 | 1.97                    | 2.21             | 111.2                    | 110.7   | 110.0   | 110.6                                |                                |
| <b>TS2_Ti</b>                                                  | 1.88    | 1.88 | 1.91 | 1.89                    | 2.24 **          | 116.3                    | 100.6   | 100.4   | 105.8                                | 24.3<br>(Ti-C-C-C)             |
| <b>TS2_Zr</b>                                                  | 2.03    | 2.02 | 2.04 | 2.03                    | 2.35 **          | 118.8                    | 98.2    | 97.2    | 104.7                                | 18.5<br>(Zr-C-C-C)             |
| <b>TS2_Hf</b>                                                  | 1.99    | 1.99 | 2    | 1.99                    | 2.32 **          | 115.9                    | 98.3    | 99.2    | 104.5                                | 24.7<br>(Hf-C-C-C)             |
| <b>TiC<sub>4</sub>H<sub>9</sub></b>                            | 1.86    | 1.86 | 1.86 | 1.86                    | 2.07 *           | 112.5                    | 113.1   | 112.8   | 112.8                                |                                |
| <b>ZrC<sub>4</sub>H<sub>9</sub></b>                            | 2       | 2    | 2    | 2.00                    | 2.23*            | 110.5                    | 110.6   | 110     | 110.4                                |                                |
| <b>HfC<sub>4</sub>H<sub>9</sub></b>                            | 1.96    | 1.96 | 1.97 | 1.96                    | 2.21*            | 110.7                    | 111.2   | 110.5   | 110.8                                |                                |
| <b>TS3a_Ti</b>                                                 | 1.87    | 1.91 | 1.87 | 1.88                    | 1.75             | 103.3                    | 105     | 119.1   | 109.1                                | 11.8<br>(Ti-C-C-H)             |
| <b>TS3a_Zr</b>                                                 | 2       | 2    | 2.05 | 2.02                    | 1.94             | 101.4                    | 103.4   | 115.1   | 106.6                                | 12.5<br>(Zr-C-C-H)             |
| <b>TS3a_Hf</b>                                                 | 1.96    | 1.97 | 2.01 | 1.98                    | 1.91             | 102.6                    | 104.0   | 113.7   | 106.8                                | 9.5<br>(Hf-C-C-H)              |
| <b>C<sub>4</sub>H<sub>8</sub>-TiH</b>                          | 1.85    | 1.84 | 1.86 | 1.85                    | 1.69             | 111.9                    | 113.6   | 111.1   | 112.1                                |                                |
| <b>C<sub>4</sub>H<sub>8</sub>-ZrH</b>                          | 1.98    | 2    | 2.0  | 1.99                    | 1.87             | 105.8                    | 113.9   | 105.9   | 108.5                                |                                |
| <b>C<sub>4</sub>H<sub>8</sub>-HfH</b>                          | 1.95    | 1.97 | 1.97 | 1.96                    | 1.85             | 104.6                    | 105.7   | 114.5   | 108.3                                |                                |
| <b>C<sub>2</sub>H<sub>4</sub>-TiC<sub>4</sub>H<sub>9</sub></b> | 1.86    | 1.87 | 1.87 | 1.87                    | 2.06             | 113.5                    | 112.6   | 112.4   | 112.8                                |                                |
| <b>C<sub>2</sub>H<sub>4</sub>-ZrC<sub>4</sub>H<sub>9</sub></b> | 2.0     | 2.02 | 2.01 | 2.01                    | 2.25             | 105.3                    | 114.2   | 105.7   | 108.4                                |                                |
| <b>C<sub>2</sub>H<sub>4</sub>-HfC<sub>4</sub>H<sub>9</sub></b> | 1.97    | 1.97 | 1.96 | 1.97                    | 2.20             | 110.1                    | 111.0   | 110.8   | 110.6                                |                                |
| <b>TS3c_Ti</b>                                                 | 1.89    | 1.91 | 1.84 | 1.88                    | 2.27             | 112.7                    | 112     | 99.9    | 108.2                                |                                |

|                                                                |      |      |      |      | (C of C <sub>4</sub> H <sub>8</sub> ) |       |       |       |       |                    |
|----------------------------------------------------------------|------|------|------|------|---------------------------------------|-------|-------|-------|-------|--------------------|
| TS3c_Zr                                                        | 2.04 | 1.98 | 2.02 | 2.01 | 2.42                                  | 108.4 | 110.7 | 100.5 | 106.5 |                    |
| TS3c_Hf                                                        | 2.01 | 1.95 | 1.99 | 1.98 | 2.39                                  | 108.8 | 110.6 | 99.8  | 106.4 |                    |
| C <sub>4</sub> H <sub>8</sub> -TiC <sub>2</sub> H <sub>5</sub> | 1.86 | 1.86 | 1.86 | 1.86 | 2.06 *                                | 113.6 | 112.8 | 112.7 | 113.0 |                    |
| C <sub>4</sub> H <sub>8</sub> -ZrC <sub>2</sub> H <sub>5</sub> | 2.0  | 2.01 | 2.0  | 2.0  | 2.24 *                                | 109.4 | 111.4 | 108.7 | 109.8 |                    |
| C <sub>4</sub> H <sub>8</sub> -HfC <sub>2</sub> H <sub>5</sub> | 1.96 | 1.97 | 1.96 | 1.96 | 2.21 *                                | 110.3 | 110.9 | 110.0 | 110.4 |                    |
| H <sub>2</sub> -TiC <sub>2</sub> H <sub>5</sub>                | 1.87 | 1.86 | 1.86 | 1.86 | 2.07 *                                | 113.0 | 113.3 | 112.3 | 112.9 |                    |
| H <sub>2</sub> -ZrC <sub>2</sub> H <sub>5</sub>                | 2.01 | 2.0  | 2.0  | 2.0  | 2.23 *                                | 110.7 | 111.2 | 109.5 | 110.5 |                    |
| H <sub>2</sub> -HfC <sub>2</sub> H <sub>5</sub>                | 1.95 | 1.98 | 1.96 | 1.96 | 2.21 *                                | 111.4 | 110.0 | 110.7 | 110.7 |                    |
| TS4_Ti                                                         | 1.86 | 1.85 | 1.91 | 1.87 | 1.8 <sup>#</sup>                      | 116.8 | 107.0 | 104.7 | 109.5 | 6.9<br>(Ti-C-H-H)  |
| TS4_Zr                                                         | 1.99 | 1.99 | 2.04 | 2.01 | 1.96 <sup>#</sup>                     | 113.5 | 104.4 | 103.3 | 107.1 | 21.6<br>(Zr-H-C-C) |
| TS4_Hf                                                         | 1.96 | 1.95 | 2.0  | 1.97 | 1.93 <sup>#</sup>                     | 112.6 | 105.0 | 103.3 | 107.0 | 0.5<br>(Hf-C-H-H)  |
| C <sub>2</sub> H <sub>6</sub> -TiH                             | 1.84 | 1.85 | 1.84 | 1.84 | 1.69                                  | 113.2 | 112.7 | 112.8 | 112.9 |                    |
| C <sub>2</sub> H <sub>6</sub> -ZrH                             | 1.98 | 2.0  | 1.99 | 1.99 | 1.87                                  | 109.2 | 111.5 | 108.2 | 109.6 |                    |
| C <sub>2</sub> H <sub>6</sub> -HfH                             | 1.95 | 1.96 | 1.96 | 1.96 | 1.84                                  | 110.0 | 111.6 | 109.0 | 110.2 |                    |

\*\* : Bond distance is between M and carbon (C) of incoming ethylene that is nearest to M.

\* : Bond distance is between M and C<sub>α</sub> of alkyl chain attached to M.

# : Bond distance is between M and H being transferred to ethyl chain

**Table S7:** PBE computed ( $E^{DFT}$ ) and zero-point ( $E^{ZPE}$ ) energies in eV of intermediates on 3-4mr ( $\equiv\text{SiO}_3$ )MH site.

|                                                                                    | (SiO) <sub>3</sub> TiH |           | (SiO) <sub>3</sub> ZrH |           | (SiO) <sub>3</sub> HfH |           |
|------------------------------------------------------------------------------------|------------------------|-----------|------------------------|-----------|------------------------|-----------|
|                                                                                    | $E^{DFT}$              | $E^{ZPE}$ | $E^{DFT}$              | $E^{ZPE}$ | $E^{DFT}$              | $E^{ZPE}$ |
| (SiO) <sub>3</sub> MH (clean)                                                      | -439.705               | 0.248     | -441.12                | 0.484     | -443.153               | 0.209     |
| C <sub>2</sub> H <sub>4</sub> --MH(SiO) <sub>3</sub>                               | -471.708               | 1.628     | -473.279               | 1.897     | -475.253               | 1.621     |
| TS(1)                                                                              | -471.630               | 1.668     | -473.165               | 1.898     | -475.054               | 1.620     |
| (SiO) <sub>3</sub> MC <sub>2</sub> H <sub>5</sub>                                  | -473.277               | 1.763     | -474.574               | 2.008     | -476.579               | 1.727     |
| C <sub>2</sub> H <sub>4</sub> --MC <sub>2</sub> H <sub>5</sub> (SiO) <sub>3</sub>  | -505.310               | 3.138     | -506.576               | 3.380     | -508.576               | 3.109     |
| TS(2) or TS(3b)                                                                    | -503.827               | 3.212     | -505.744               | 3.454     | -507.525               | 3.176     |
| (SiO) <sub>3</sub> MC <sub>4</sub> H <sub>9</sub>                                  | -506.334               | 3.276     | -507.652               | 3.514     | -509.658               | 3.235     |
| TS(3a)                                                                             | -504.683               | 3.150     | -506.222               | 3.385     | -508.161               | 3.112     |
| 1-C <sub>4</sub> H <sub>8</sub> --MH(SiO) <sub>3</sub>                             | -504.922               | 3.133     | -506.456               | 3.396     | -508.418               | 3.123     |
| C <sub>2</sub> H <sub>4</sub> --MC <sub>4</sub> H <sub>9</sub> (SiO) <sub>3</sub>  | -538.369               | 4.658     | -539.663               | 4.898     | -541.676               | 4.611     |
| TS(3c)                                                                             | -536.717               | 4.581     | -538.413               | 4.824     | -540.436               | 4.552     |
| 1-C <sub>4</sub> H <sub>8</sub> -MC <sub>2</sub> H <sub>5</sub> (SiO) <sub>3</sub> | -538.531               | 4.652     | -539.756               | 4.900     | -541.781               | 4.629     |
| H <sub>2</sub> --MC <sub>2</sub> H <sub>5</sub>                                    | -480.058               | 2.080     | -481.359               | 2.321     | -483.314               | 2.035     |
| TS(4)                                                                              | -479.044               | 2.173     | -480.538               | 2.399     | -482.501               | 2.118     |
| MH--C <sub>2</sub> H <sub>6</sub>                                                  | -480.210               | 2.242     | -481.655               | 2.484     | -483.686               | 2.210     |

**Table S8:** ZPE corrected reactions (**dE**) and activation (**E<sub>a</sub>**) energies in eV for ethylene dimerization on 3-4mr ( $\equiv\text{SiO}$ )<sub>3</sub>M(H). Non-activated adsorption steps are denoted by “\*”.

| Name | Reactions                                                                                                          | Ti             |       | Zr             |       | Hf             |        |
|------|--------------------------------------------------------------------------------------------------------------------|----------------|-------|----------------|-------|----------------|--------|
|      |                                                                                                                    | E <sub>a</sub> | dE    | E <sub>a</sub> | dE    | E <sub>a</sub> | dE     |
| 1*   | $\text{C}_2\text{H}_4(\text{g}) + \text{MH} \rightarrow \text{C}_2\text{H}_4\text{--MH}$                           | 0              | -0.01 | 0              | -0.14 | 0              | -0.08  |
| 1    | $\text{C}_2\text{H}_4\text{--MH} \rightarrow \text{MC}_2\text{H}_5$                                                | 0.12           | -1.43 | 0.12           | -1.18 | 0.20           | -1.22  |
| 2*   | $\text{C}_2\text{H}_4(\text{g}) + \text{MC}_2\text{H}_5 \rightarrow \text{C}_2\text{H}_4\text{--MC}_2\text{H}_5$   | 0              | -0.05 | 0              | -0.02 | 0              | -0.004 |
| 2    | $\text{C}_2\text{H}_4\text{--MC}_2\text{H}_5 \rightarrow \text{MC}_4\text{H}_9$                                    | 1.56           | -0.89 | 0.91           | -0.94 | 1.12           | -0.96  |
| 3a   | $\text{MC}_4\text{H}_9 \rightarrow \text{C}_4\text{H}_8\text{--MH}$                                                | 1.52           | 1.27  | 1.30           | 1.08  | 1.37           | 1.13   |
| 3a*  | $\text{C}_4\text{H}_8\text{--MH} \rightarrow 1\text{-C}_4\text{H}_8(\text{g}) + \text{MH}$                         | 0              | 0.04  | 0              | 0.13  | 0              | 0.06   |
| 3c*  | $\text{C}_2\text{H}_4(\text{g}) + \text{MC}_4\text{H}_9 \rightarrow \text{C}_2\text{H}_4\text{--MC}_4\text{H}_9$   | 0              | -0.04 | 0              | -0.02 | 0              | -0.03  |
| 3c   | $\text{C}_2\text{H}_4\text{--MC}_4\text{H}_9 \rightarrow \text{MC}_2\text{H}_5 + 1\text{-C}_4\text{H}_8(\text{g})$ | 1.57           | -0.10 | 1.18           | -0.10 | 1.18           | -0.09  |
| 4*   | $\text{H}_2(\text{g}) + \text{MC}_2\text{H}_5 \rightarrow \text{H}_2\text{--MC}_2\text{H}_5$                       | 0              | 0.03  | 0              | 0.02  | 0              | 0.06   |
| 4    | $\text{H}_2\text{--MC}_2\text{H}_5 \rightarrow \text{HM} + \text{C}_2\text{H}_6(\text{g})$                         | 1.11           | 0.02  | 0.9            | -0.1  | 0.90           | -0.17  |

a)

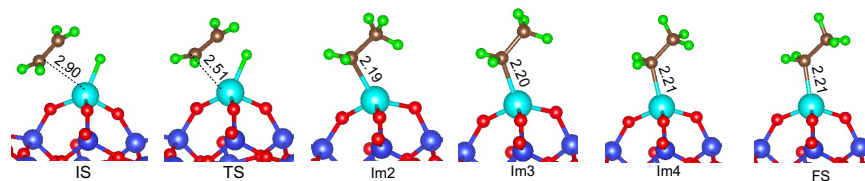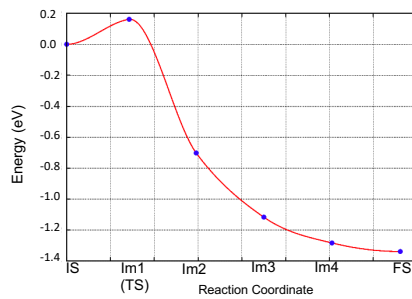

b)

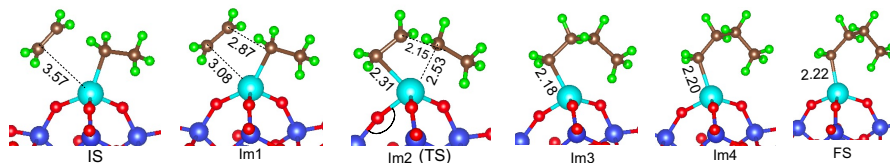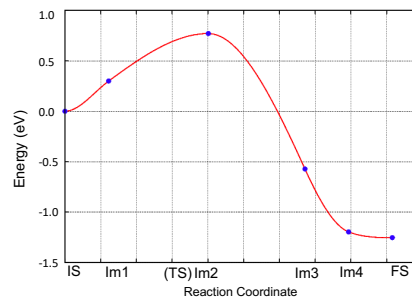

c)

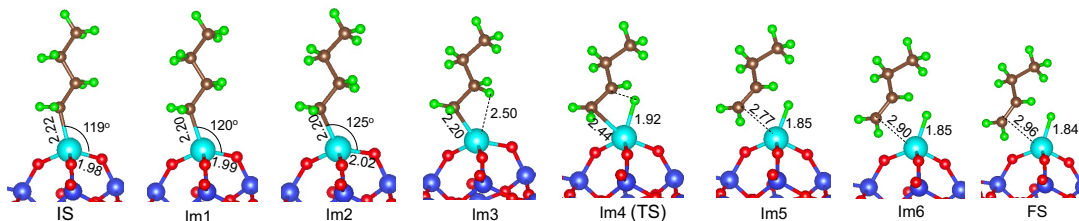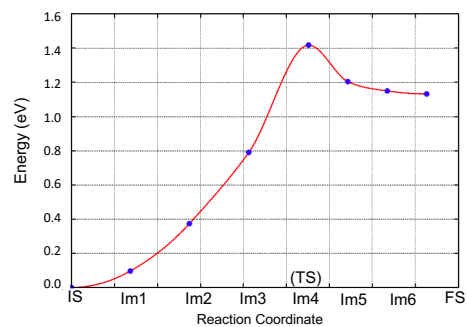

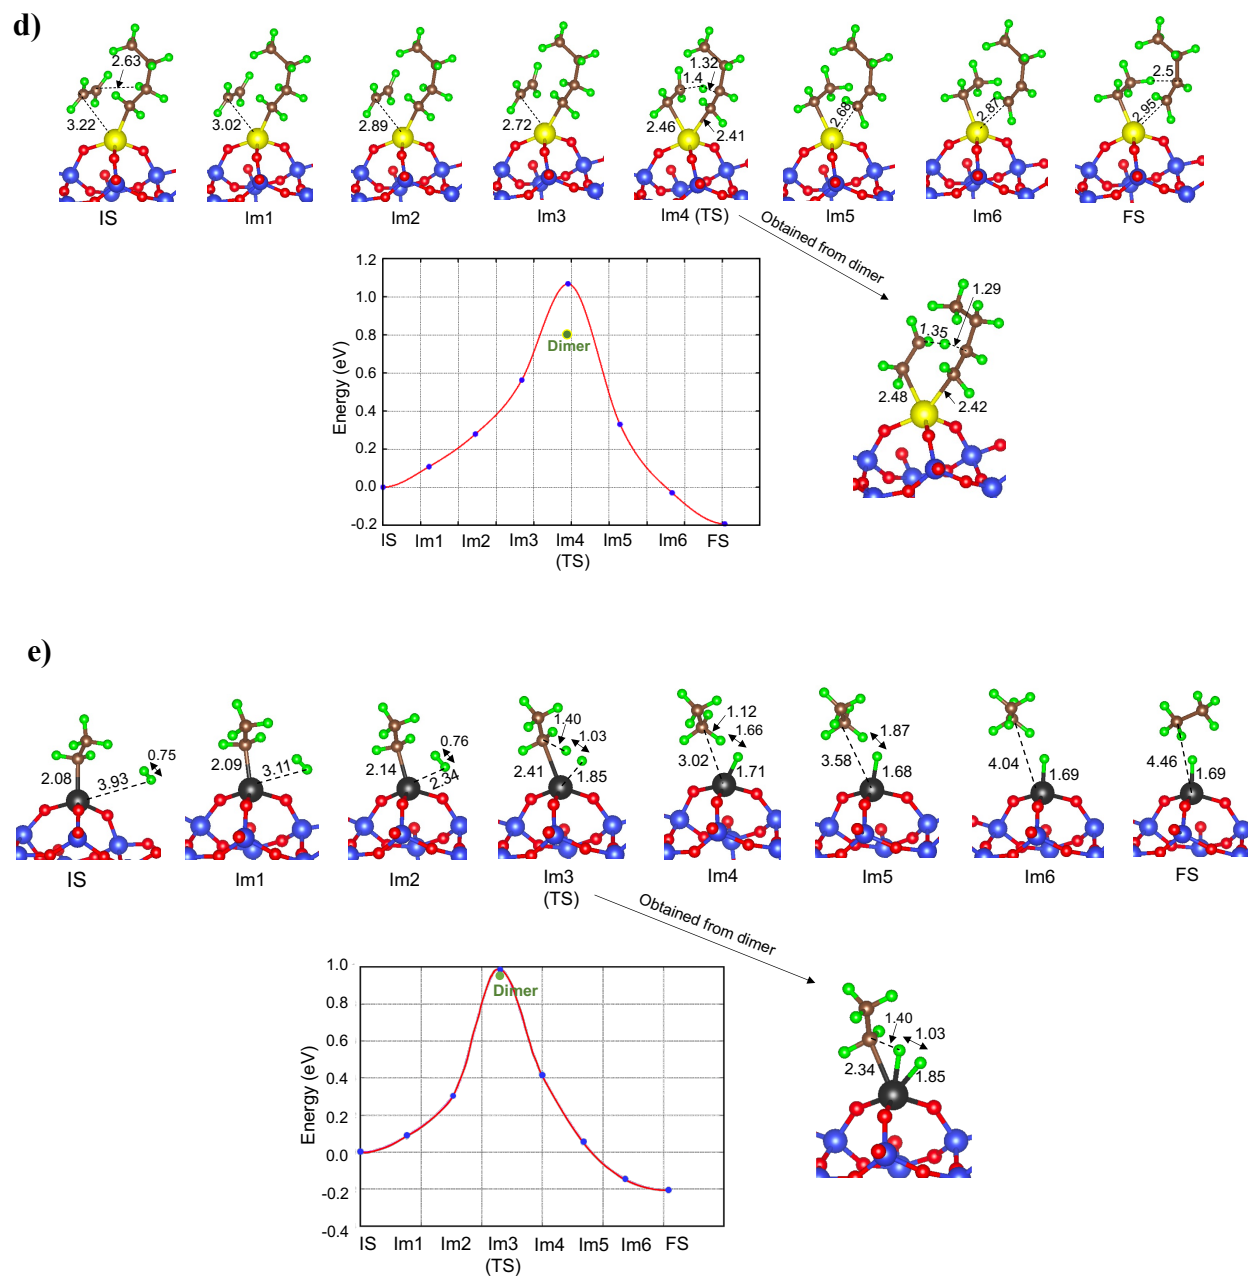

**Fig. S7:** Transition state search results on 3-4mr (SiO)<sub>3</sub>MH sites. **(a), (b), (c)** CI-NEB results for TS(1), TS(2), TS(3a), respectively, on (≡SiO)<sub>3</sub>HfH **(d)** CI-NEB and dimer results for TS(3c) on (≡SiO)<sub>3</sub>ZrH. **(e)** CI-NEB and dimer results for TS(4) on (≡SiO)<sub>3</sub>TiH.

### 3-4mr transition state distortions

Induced strain is measured by the average stretch,  $\langle a \rangle$  generated in M-O-Si angle during transition from initial state (not to be a physisorbed state) to TS where the most rearrangement occurs in the metal's coordination sphere and is calculated as

$$\langle a \rangle = \frac{\sum_{l=1}^3 (a_l^\dagger - a_l)}{3}$$

$a_l$  and  $a_l^\dagger$  are M-O-Si angles in initial state (IS) and the leading TS. For instance, IS and TS pairs are  $(\equiv\text{SiO})_3\text{MH}$  and TS(1),  $(\equiv\text{SiO})_3\text{MC}_2\text{H}_5$  and TS(2),  $(\equiv\text{SiO})_3\text{MC}_4\text{H}_9$  and TS(3a), respectively. From Table S9,  $\langle a \rangle$  is largest in TS(2) than in TS(3a) and TS(1). It is not precisely correlated to changes in activation barrier across Ti, Zr and Hf, but provides a summary about geometric distortion in TS relative to IS.

**Table S9:** M-O-Si bond angles ( $\angle$ ) and  $\langle a \rangle$  in degrees ( $^\circ$ ) for 3-4mr  $(\equiv\text{SiO})_3\text{MH}$  site (M= Ti, Zr, Hf)

| Species on 3-4mr silica(111)        | $\angle\text{Si-O-M}$ ( $^\circ$ ) |          |          | $\overline{\angle\text{SiOM}}$ ( $^\circ$ ) | Average Induced Strain, $\langle a \rangle$ ( $^\circ$ ) |                                  |
|-------------------------------------|------------------------------------|----------|----------|---------------------------------------------|----------------------------------------------------------|----------------------------------|
|                                     | Si1-O1-M                           | Si2-O2-M | Si3-O3-M |                                             | IS $\rightarrow$ TS                                      | $\langle a \rangle$ ( $^\circ$ ) |
| Ti-H                                | 142.4                              | 141.7    | 139.9    | 141.3                                       |                                                          |                                  |
| Zr-H                                | 141.8                              | 141      | 139.1    | 140.6                                       |                                                          |                                  |
| Hf-H                                | 142.1                              | 141.6    | 139.5    | 141.1                                       |                                                          |                                  |
| TS1_Ti                              | 148.1                              | 143.9    | 140.1    | 144                                         | TiH $\rightarrow$ TS1                                    | 144 - 141.3 = 2.7                |
| TS1_Zr                              | 144.8                              | 144.2    | 140.7    | 143.2                                       | ZrH $\rightarrow$ TS1                                    | 143.2 - 140.6 = 2.6              |
| TS1_Hf                              | 145.8                              | 144.9    | 142.3    | 144.3                                       | HfH $\rightarrow$ TS1                                    | 144.3 - 141.1 = 3.2              |
| TC <sub>2</sub> H <sub>5</sub> (2)  | 143.3                              | 137.1    | 140.4    | 140.3                                       |                                                          |                                  |
| ZrC <sub>2</sub> H <sub>5</sub> (2) | 138.8                              | 134.8    | 142.6    | 138.7                                       |                                                          |                                  |
| HfC <sub>2</sub> H <sub>5</sub> (2) | 143.8                              | 140.0    | 136.0    | 139.3                                       |                                                          |                                  |
| TS2_Ti                              | 171.2                              | 139.4    | 139.7    | 150.1                                       | Ti: 2 $\rightarrow$ TS2                                  | 150.1 - 140.3 = 9.8              |
| TS2_Zr                              | 163.6                              | 138.6    | 138.3    | 146.8                                       | Zr: 2 $\rightarrow$ TS2                                  | 146.8 - 138.7 = 8.1              |
| TS2_Hf                              | 165.1                              | 140.2    | 139.9    | 148.4                                       | Hf: 2 $\rightarrow$ TS2                                  | 148.4 - 139.3 = 9.1              |
| TiC <sub>4</sub> H <sub>9</sub> (4) | 141.3                              | 140.2    | 138.9    | 140.1                                       |                                                          |                                  |
| ZrC <sub>4</sub> H <sub>9</sub> (4) | 140.2                              | 138.1    | 140.0    | 139.4                                       |                                                          |                                  |
| HfC <sub>4</sub> H <sub>9</sub> (4) | 141.4                              | 140.7    | 138.0    | 140.0                                       |                                                          |                                  |
| TS3a_Ti                             | 147.0                              | 144.0    | 141.3    | 144.1                                       | Ti: 4 $\rightarrow$ TS3a                                 | 144.1 - 140.1 = 4.0              |
| TS3a_Zr                             | 147.3                              | 141.4    | 141.2    | 143.3                                       | Zr: 4 $\rightarrow$ TS3a                                 | 143.3 - 139.4 = 3.9              |
| TS3a_Hf                             | 149.1                              | 141.7    | 142.6    | 144.5                                       | Hf: 4 $\rightarrow$ TS3a                                 | 144.5 - 140.0 = 4.5              |



## Entropy models

ASE's<sup>10</sup> IdealGasThermo and HarmonicThermo functions are used to calculate ideal gas entropy and entropy of surface species plus transition state species, respectively in the harmonic limit with rigid rotor approximation.

$$S_{total} = S_{trans}^o + S_{vibrational} + S_{rotational} + S_{electronic} \quad (S.3)$$

Translation entropy ( $S_{trans}$ ) of ideal gas of molecular mass,  $m$  at standard pressure,  $P^o$  and temperature,  $T$  from Sackur-Tetrode Equation<sup>8</sup>

$$S_{trans}^o = k_B \left[ \ln \left[ \left( \frac{2\pi m k_B T}{h^2} \right)^{\frac{3}{2}} \frac{k_B T}{P^o} \right] + \frac{5}{2} \right] \quad (S.4)$$

Where  $k_B$  is Boltzmann constant and  $h$  is Planck's constant. At 298 K and 475 K,  $T \cdot S_{trans,C2H4}^o$  is 0.464 eV and 0.784 eV, respectively, while  $T \cdot S_{trans,C4H8}^o$  is 0.491 eV and 0.826 eV, respectively.

$S_{electronic} = 0$  as no spin degenerate ground states exist for any species

$$S_{vibrational} = k_B \sum_i \frac{h\nu_i}{k_B T} \left( \frac{1}{e^{\frac{h\nu_i}{k_B T}} - 1} \right) - k_B \sum_i \ln \left( 1 - e^{-\frac{h\nu_i}{k_B T}} \right) \quad (S.5)$$

Being non-linear, they have  $3N-6$  real vibrational modes ( $\nu_i$ ), where  $N$  is the number of atoms in the gas molecule. Both ethylene and 1-butene are non-linear molecules with symmetry numbers of 4 and 1, respectively. For surface species with some atoms frozen, there should be  $3N$  real modes and  $3N-1$  real modes of vibration for a transition state.

Additionally, for non-linear gas molecules,

$$S_{rotational} = k_B \left[ \ln \left[ \left( \frac{8\pi^2 k_B T}{h^2} \right)^{\frac{3}{2}} \frac{\sqrt{I_A I_B I_C}}{\sigma} \right] + 1 \right] \quad (S.6a)$$

Where  $I_A I_B I_C$  is the product of inertia of a molecule, summed over all atoms of the molecule,  $\sigma$  denotes the "rotational symmetry number" for the molecule.

While for linear gas molecules like hydrogen,

$$S_{rotational} = k_B \left[ \ln \left( \frac{8\pi^2 I k_B T}{\sigma h^2} \right) + 1 \right] \quad (S.6b)$$

## 3-4mr free energy surfaces

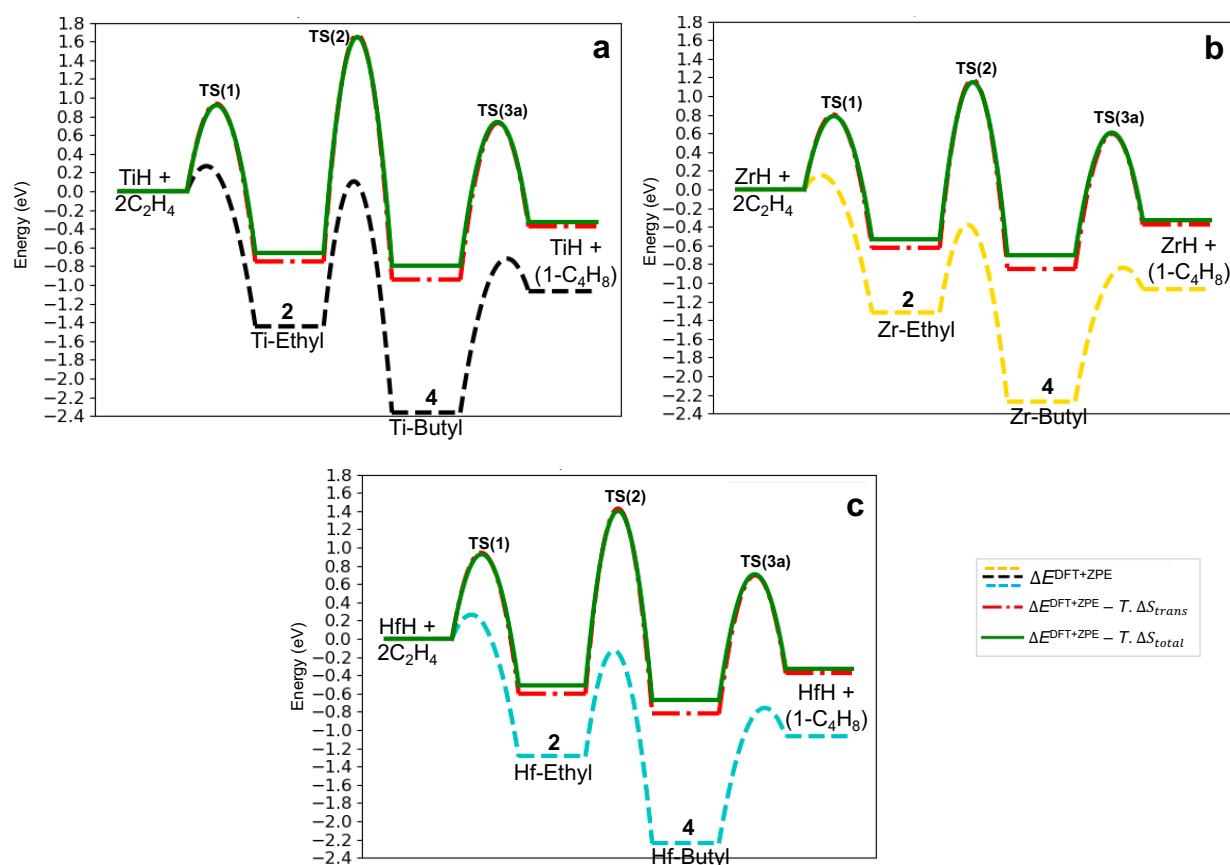

**Fig. S8:** Energy profiles of  $2\text{C}_2\text{H}_4 \rightarrow 1\text{-C}_4\text{H}_8$  on 3-4mr ( $\equiv\text{SiO}$ )<sub>3</sub>M(H) sites of **a) Ti**, **b) Zr** and **c) Hf**. ZPE corrected electronic energy profile (dashed lines): Ti (black), Zr (yellow) and Hf (blue). Red (dot dashed) and green (solid) curves are the free energies at  $T = 473\text{ K}$ ,  $P = 1\text{ bar}$  with either **1)** complete loss of translational entropy ( $S_{trans}$ ) of gas molecule on reacting with surface, while retaining rotational and vibrational entropy (red curve) **2)** from harmonic vibrational modes of surface species combined with rigid rotor approximation ( $S_{total}$ ) (green curve). Physisorbed states are excluded from this comparison.

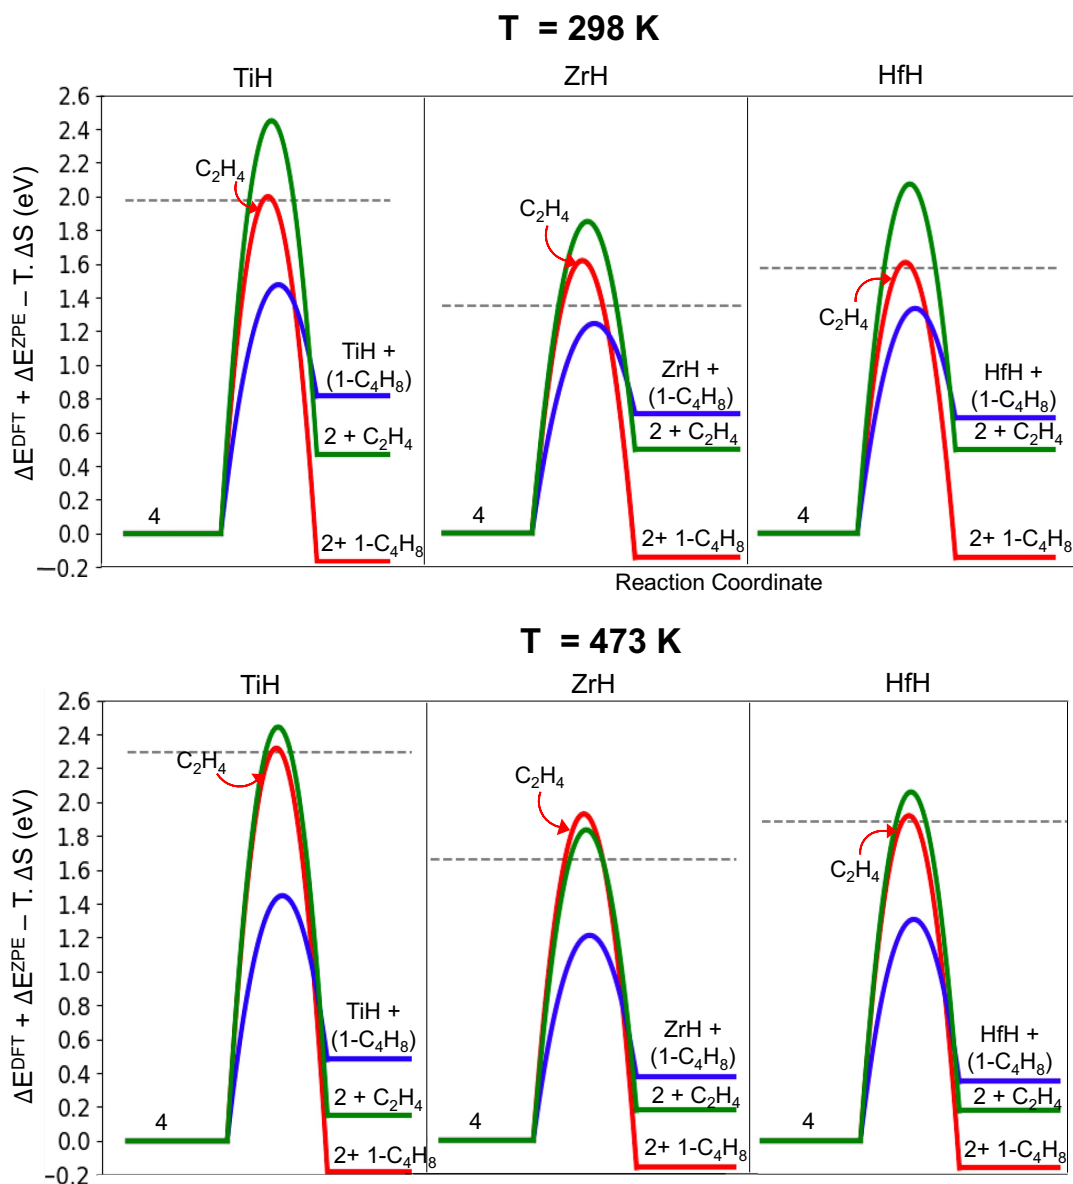

**Fig. S9:** PES of termination routes at  $T = 298$  K and  $T = 473$  K,  $P = 1$  bar on the 3-4mr ( $\equiv\text{SiO}$ )<sub>3</sub>MC<sub>4</sub>H<sub>9</sub> sites on silica (111). Termination routes are color coded as in Fig. 4:  $\beta$ -H to M (blue curve, via TS(3a)),  $\beta$ -alkyl transfer to M (green curve) and  $\beta$ -H transfer to ethylene (red curve). Dashed line is energy barrier associated with chain growth via TS(2).

## 3-4mr microkinetic models

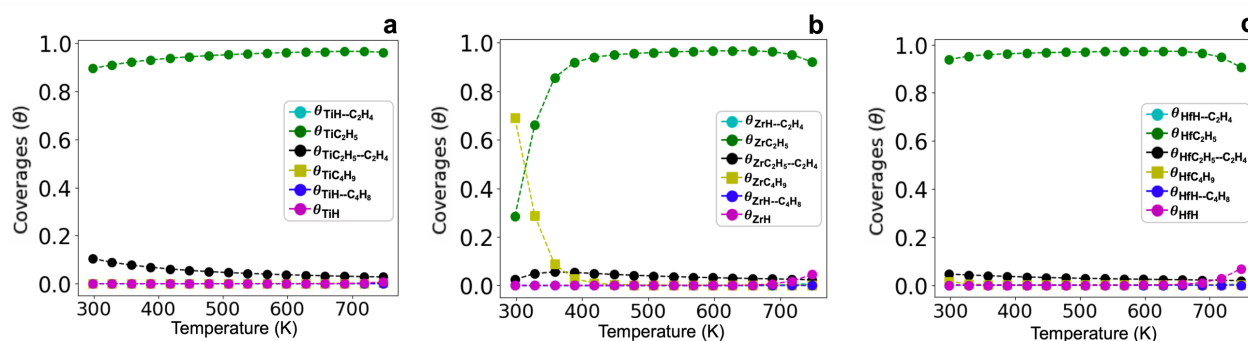

**Fig. S10:** Steady state coverages for 3-4mr ( $\equiv\text{SiO}$ )<sub>3</sub>MH site of **a)** Ti, **b)** Zr and **c)** Hf against temperature at  $P_{\text{C}_2\text{H}_4} = 17$  bar.

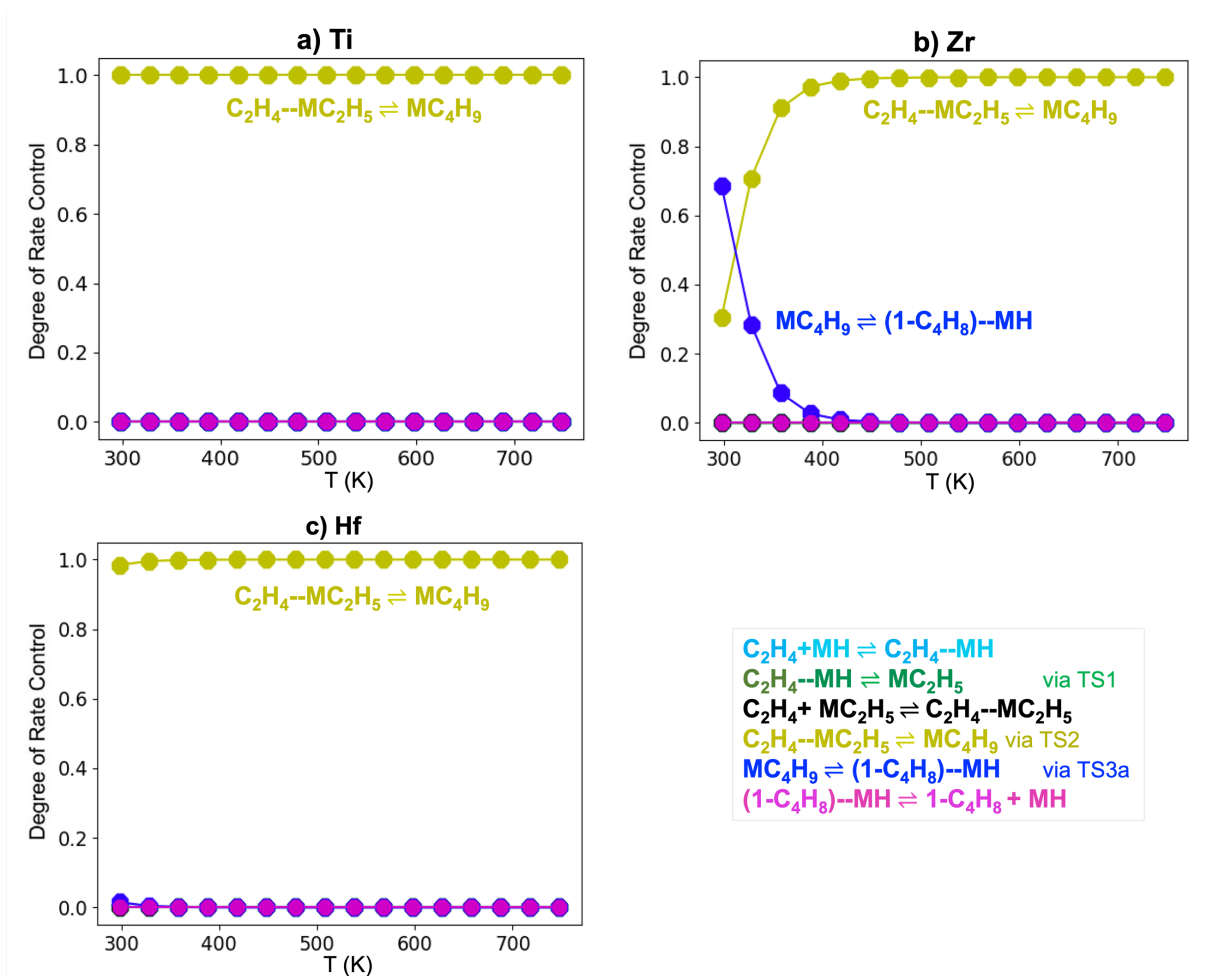

**Fig. S11:** Degree of rate control at  $P_{\text{C}_2\text{H}_4} = 17$  bar on **a)** Ti **b)** Zr and **c)** Hf 3-4mr ( $\equiv\text{SiO}$ )<sub>3</sub>MH site. Reactions are color coded as shown.

## Degree of Polymerization ( $\overline{P}_n$ )

Number average molecular weight  $M_n$  is calculated by equation (S.7a).  $M_i$  is the molecular weight of grown hydrocarbon chain composed of “ $i$ ” monomer units.  $N_i$  is the number of chains having that molecular weight.  $M_0$  is the molecular weight of ethylene monomer.

We express the rate of production of  $N_i$  (eq. S.7a) as the rate of chain termination from surface species having identical monomer units or its coverage  $\theta_i$ , where  $k_{term}$  is the termination rate constant.

$$M_n = \frac{\sum M_i \cdot N_i}{\sum N_i} = \frac{\sum (i M_0) \cdot N_i}{\sum N_i} \quad (S.7a)$$

$$M_n = \frac{M_0 \sum_{i=1}^{\infty} i \cdot (k_{term} \theta_i)}{\sum k_{term} \cdot \theta_i} \quad (S.7b)$$

Assuming, C-C bond formation step by migratory insertion into M-C bond and termination to be irreversible and rate constants  $k_{cc}$ ,  $k_{term}$  remaining same for oligomers of all chain lengths, coverage of every surface species is expressed in terms of its predecessor<sup>7</sup> and a constant ( $\alpha$ ).  $\alpha$  is probability of propagation in Cossee-Arlman mechanism.

$$\text{For } i > 1, \quad \theta_i = \alpha \theta_{i-1} = \alpha^{i-1} \cdot \theta_1 \quad (S.8)$$

Upon simplifying eq. S.7b by substituting eq. S.8,  $\overline{P}_n$  can be calculated from eq S.9<sup>7</sup>

$$\overline{P}_n = \frac{M_n}{M_0} = \frac{1}{(1-\alpha)} \quad (S.9)$$

In  $\overline{P}_n$  calculation, physisorption step is not considered and M-C insertion takes place as  $MP_{i-1} + C_2H_4 \rightarrow MP_i$ .  $MP_i$  is surface species composed of hydrocarbon chain of “ $i$ ” monomer units bonded to metal site.

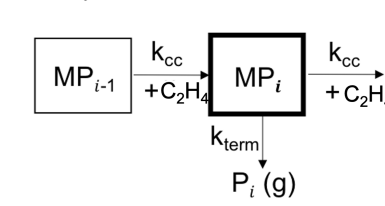

At steady state, by mole balance

$$MP_i = \frac{P_{C_2H_4} \cdot k_{cc}}{(P_{C_2H_4} \cdot k_{cc} + k_{term})} MP_{i-1} \quad (S.10)$$

$$\alpha = \frac{P_{C_2H_4} \cdot k_{cc}}{(P_{C_2H_4} \cdot k_{cc} + k_{term})} \quad (S.11)$$

With hydrogen present,

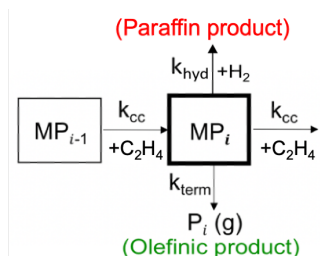

By steady state mole balance,  $MP_i = \frac{P_{C_2H_4} \cdot k_{cc}}{(P_{C_2H_4} \cdot k_{cc} + k_{term} + P_{H_2} \cdot k_{hyd})} MP_{i-1}$

$$\bar{P}_n = \frac{1}{(1 - \alpha_{H_2})} = \frac{1}{(1 - \frac{P_{C_2H_4} \cdot k_{cc}}{P_{C_2H_4} \cdot k_{cc} + k_{term} + P_{H_2} \cdot k_{hyd}})} = 1 + \frac{P_{C_2H_4} \cdot k_{cc}}{k_{term} + P_{H_2} \cdot k_{hyd}} \quad (S.12)$$

Kinetic parameters,  $k_{cc}$  from 2→TS(2),  $k_{term}$  from 4 to TS(3a),  $k_{hyd}$  is hydrogenolysis rate constant.

Low pressure and temperature rates and  $\bar{P}_n$  for Zr site models

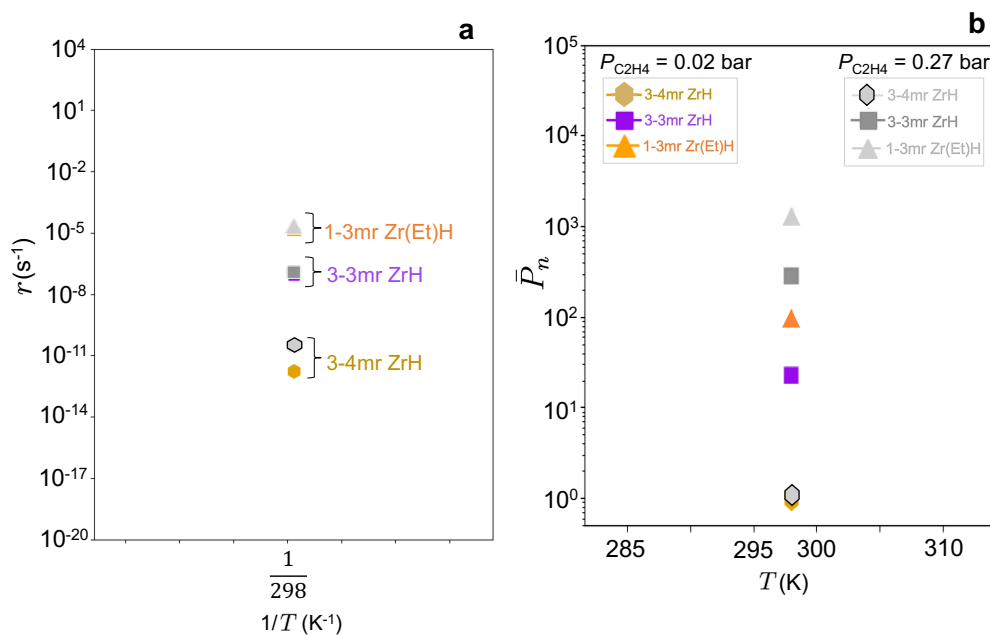

**Fig. S12:** (a) Computed rates,  $r$  and (b) degree of polymerization on model ZrH sites at  $P_{C_2H_4} = 0.02$  bar (colored points) and 0.27 bar (grayscale points)

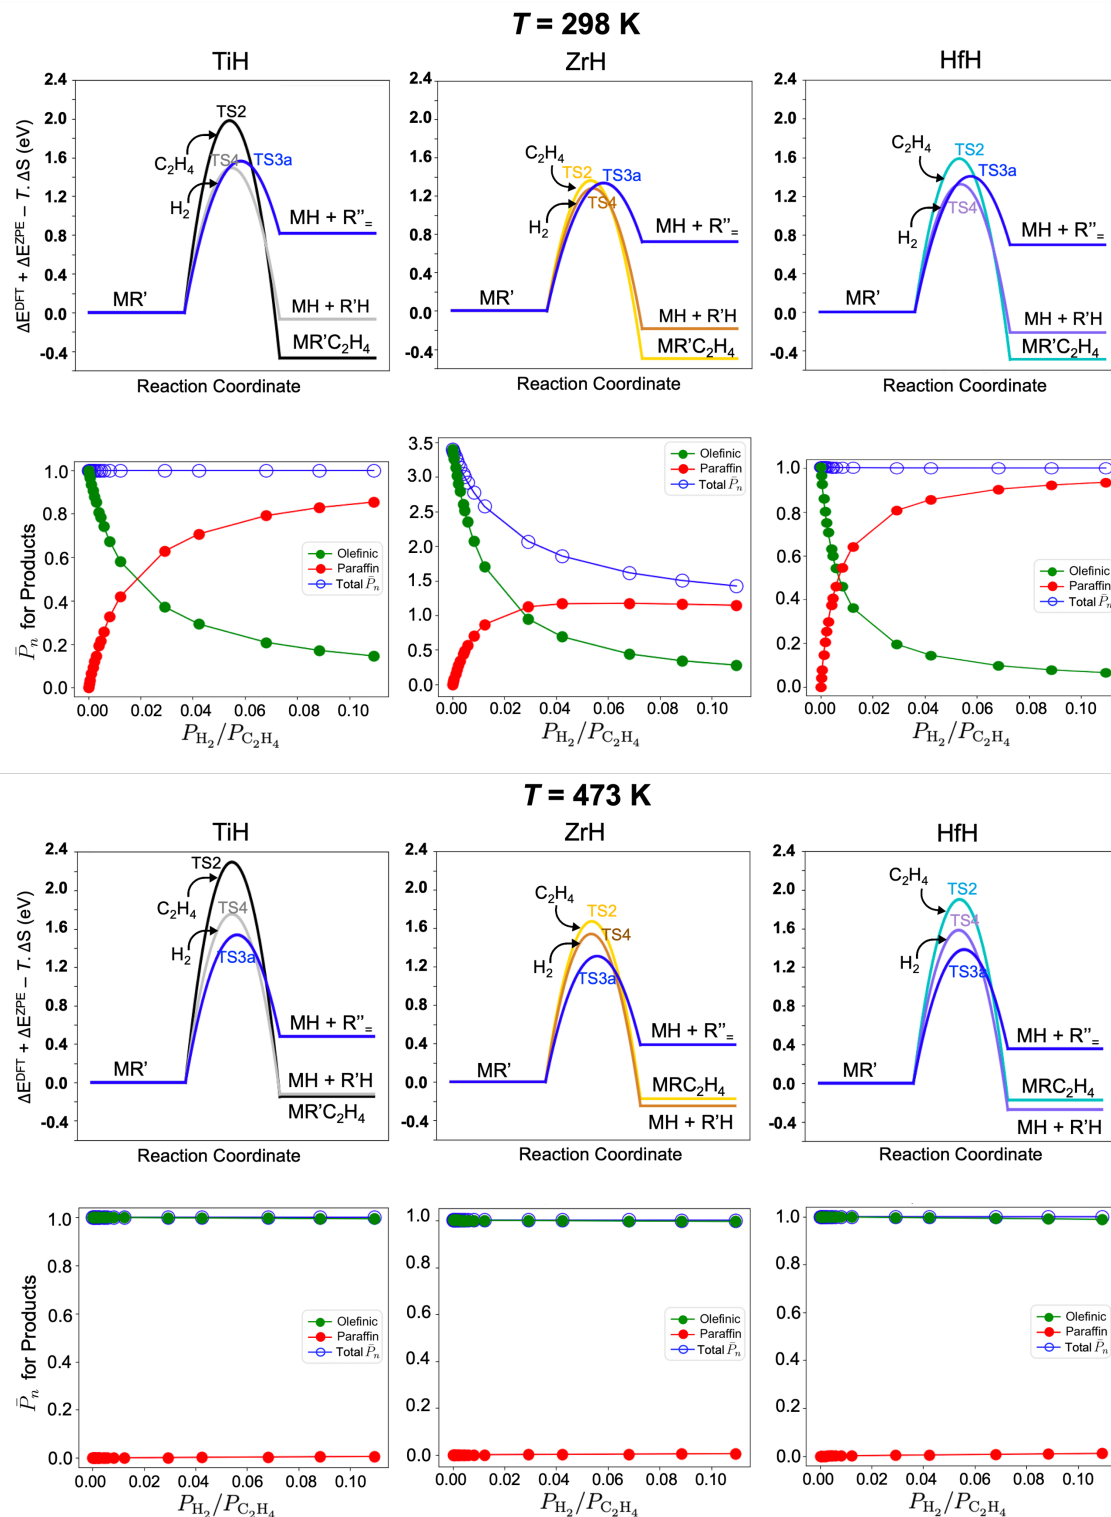

**Fig. S13:** (top) Free energy profiles for competing M-alkyl (MR') reaction on Ti, Zr, and Hf 3-4mr sites at 298 K. (second row)  $\bar{P}_n$  against  $H_2/C_2H_4$  molar ratio at 298 K. Third and fourth rows, same results at 473 K. Reactions shown are: 1) M-C insertion via TS(2), 2) hydrogenolysis to alkane (R'H) via TS(4) and 3) termination by  $\beta$ -H to M via TS(3a) to olefin (R''=).

## Grafting and hydrogenolysis of $Zr(CH_3)_4$ to 3-3mr site

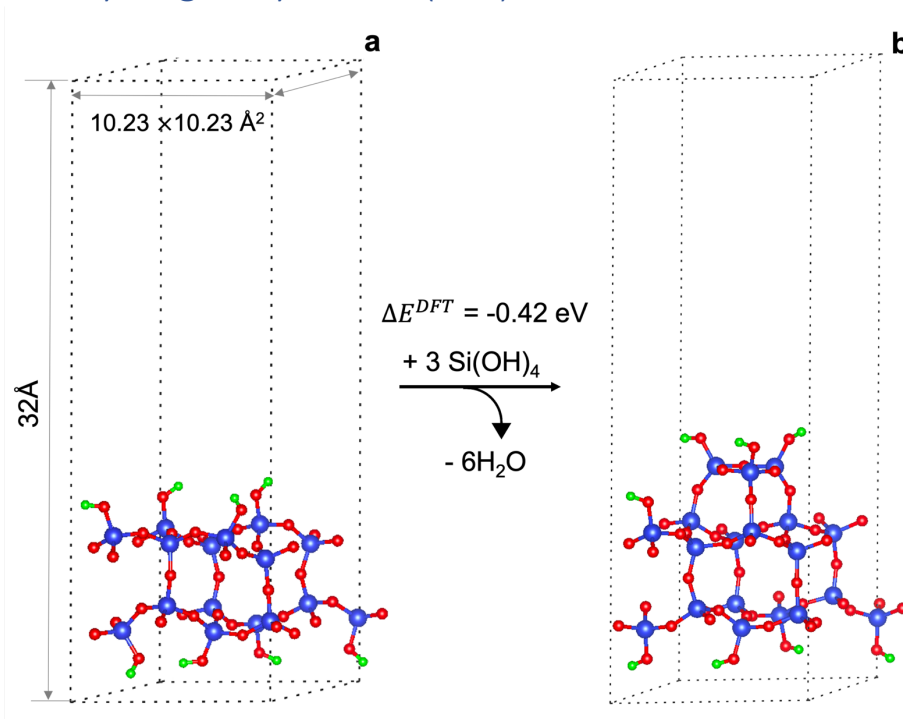

**Fig. S14:** Generation of reconstructed silica (in **b**) from functionalization of silica (111) facet (in **a**).

Grafting of precursor  $Zr(CH_3)_4$  on silanols of reconstructed silica surface (Fig. S14b) is performed as per reaction (s1) to form  $(\equiv\text{SiO})_n\text{Zr}(\text{CH}_3)_{4-n}$  species on surface, where  $n=1, 2$  or  $3$ . The transformation of these grafted Zr-alkyls to corresponding hydrides occurs as per reactions (s2). Structures of  $(\equiv\text{SiO})_n\text{Zr}(\text{CH}_3)_{4-n}$ , and  $(\equiv\text{SiO})_n\text{Zr}(\text{H})_{4-n}$  are in Fig. S16, in top row and bottom row, respectively with their energies in Table S10. Thermodynamics of sequential grafted complexes and their hydrogenation is shown in Fig. S15a with reaction energies in Table S11. Fig. S15b is a parity plot comparing heats of grafting ( $\Delta E_{rxn}^{DFT}$ ) of  $Zr(\text{CH}_3)_4$  on reconstructed silica against the original silica(111) model.

**Table S10:** PBE computed energies ( $E^{DFT}$ ) in eV of grafting and hydrogenolysis structures on reconstructed silica.

| Species                                       | n | $E^{DFT}$ (eV) |
|-----------------------------------------------|---|----------------|
| $(\equiv\text{SiO})\text{M}(\text{CH}_3)_3$   | 1 | -573.702       |
| $(\equiv\text{SiO})_2\text{M}(\text{CH}_3)_2$ | 2 | -551.044       |
| $(\equiv\text{SiO})_3\text{M}(\text{CH}_3)$   | 3 | -527.632       |
| $(\equiv\text{SiO})\text{M}(\text{H})_3$      | 1 | -522.341       |
| $(\equiv\text{SiO})_2\text{M}(\text{H})_2$    | 2 | -516.885       |
| $(\equiv\text{SiO})_3\text{M}(\text{H})$      | 3 | -510.564       |
| Clean Silica slab                             |   | -508.103       |



**Table S11:** PBE-computed heats of grafting  $(\text{CH}_3)_4\text{Zr}$  in eV on reconstructed silica surface

| M                                     | Grafting $\text{Zr}(\text{CH}_3)_4$ |       |       | Hydrogenolysis of grafted $(\text{SiO})_n\text{Zr}(\text{CH}_3)_{4-n}$ |       |       |
|---------------------------------------|-------------------------------------|-------|-------|------------------------------------------------------------------------|-------|-------|
|                                       | Calculated by reaction (s1)         |       |       | Calculated by reaction (s2)                                            |       |       |
|                                       | n=1                                 | n=2   | n=3   | n=1                                                                    | n=2   | n=3   |
| Zr on reconstructed silica            | -2.17                               | -3.54 | -4.16 | -0.45                                                                  | -0.38 | -0.20 |
| Zr on silica (111)<br>(from Table S3) | -2.27                               | -4.21 | -5.81 | -0.62                                                                  | -0.56 | -0.21 |

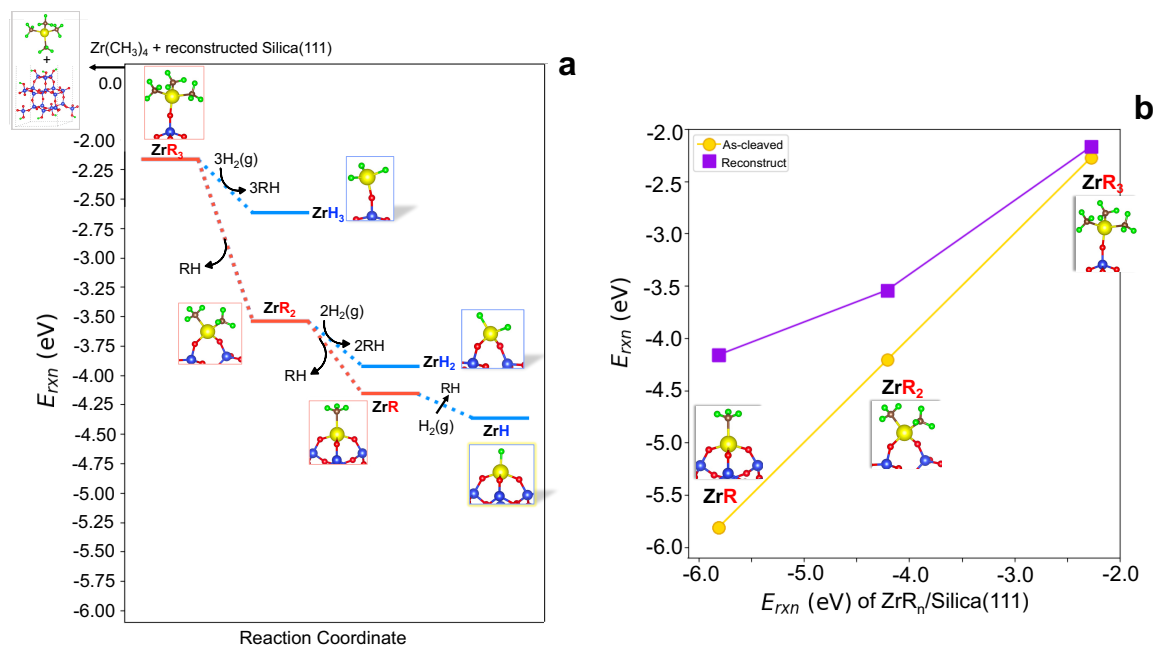

**Fig. S15:** a) Grafting and hydrogenolysis of  $\text{Zr}(\text{CH}_3)_4$  on reconstructed silica(111) b) Parity plot of  $\text{Zr}(\text{CH}_3)_4$  grafting energies on reconstructed silica vs parent/as-cleaved silica (111). Parity line shown in yellow.

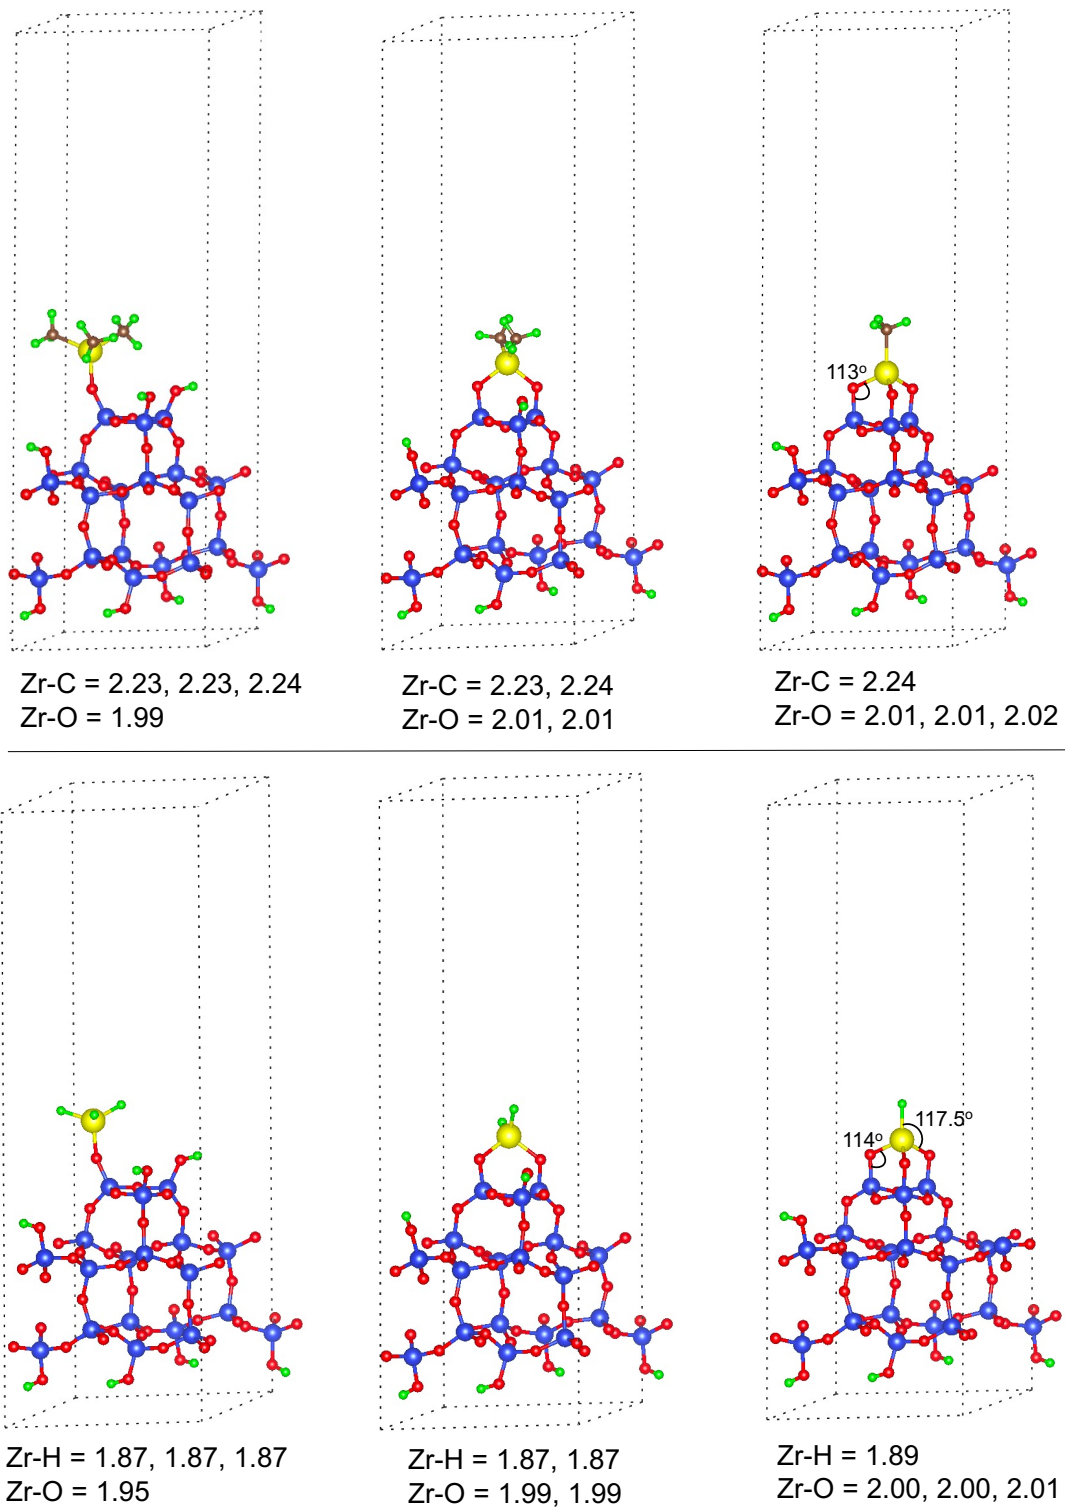

**Fig. S16:** Grafting and hydrogenolysis intermediates on reconstructed silica. H: green, C: brown, O: red, Si: blue, Zr: yellow (●). Distances in Å. CONTCARs in Zenodo.<sup>11</sup>

### 3-3mr oligomerization intermediates and reactions

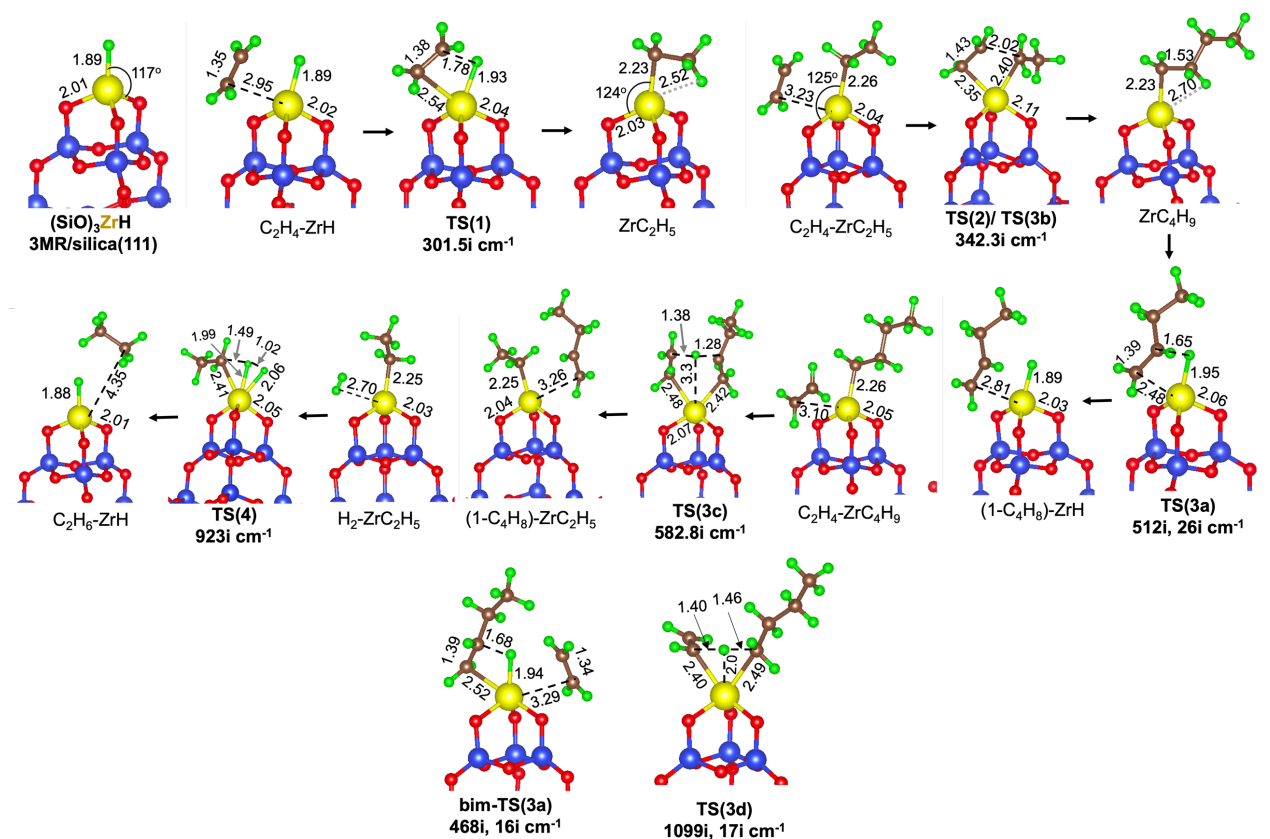

**Fig. S17:** Oligomerization intermediates on 3-3mr ( $\equiv\text{SiO}$ )<sub>3</sub>ZrH site. Distances in Å. CONTCARs in Zenodo.<sup>11</sup>

**Table S12:** Structural parameters of species formed along pathways in Fig. 2 for  $2\text{C}_2\text{H}_4 \rightarrow \text{C}_4\text{H}_8$  and  $\text{C}_2\text{H}_4 + \text{H}_2 \rightarrow \text{C}_2\text{H}_6$  on 3-3mr ( $\equiv\text{SiO}$ )<sub>3</sub>ZrH site. **M-O** (Å) is bond distance between M and nearest O atoms.

$\overline{\text{M}-\text{O}}$  is the average M-O bond distance and is calculated by:  $\overline{\text{M}-\text{O}} = \frac{(\text{M}-\text{O1})+(\text{M}-\text{O2})+(\text{M}-\text{O3})}{3}$ .

Similarly,  $\angle\text{OMO}$  is the average O-M-O angle ( $\angle$ ) in degrees ( $^\circ$ ). Dihedral angle is between atoms in which bond is formed or broken during transition state

| Species                                                        | M-O (Å) |      |      | $\overline{\text{M}-\text{O}}$<br>(Å) | Smallest<br>M-H or<br>M-C(Å)                  | $\angle\text{O-M-O}$ ( $^\circ$ ) |         |         | $\overline{\angle\text{OMO}}$<br>( $^\circ$ ) | $\angle\text{Dihedral}$<br>( $^\circ$ ) |
|----------------------------------------------------------------|---------|------|------|---------------------------------------|-----------------------------------------------|-----------------------------------|---------|---------|-----------------------------------------------|-----------------------------------------|
|                                                                | M-O1    | M-O2 | M-O3 |                                       |                                               | O1-M-O2                           | O2-M-O3 | O3-M-O1 |                                               |                                         |
| Zr-H                                                           | 2.01    | 2.01 | 2.01 | 2.01                                  | 1.89                                          | 100.3                             | 100.4   | 100.7   | 100.5                                         |                                         |
| C <sub>2</sub> H <sub>4</sub> -ZrH                             | 2.02    | 2.02 | 2.01 | 2.02                                  | 1.89                                          | 103.3                             | 97.0    | 96.6    | 99.0                                          |                                         |
| TS1_Zr                                                         | 2.02    | 2.01 | 2.04 | 2.02                                  | 1.93                                          | 103.9                             | 95.8    | 95.7    | 98.5                                          | 9.8                                     |
| ZrC <sub>2</sub> H <sub>5</sub>                                | 2.03    | 2.02 | 2.02 | 2.02                                  | 2.23                                          | 100.3                             | 102.0   | 100.2   | 100.8                                         |                                         |
| C <sub>2</sub> H <sub>4</sub> -ZrC <sub>2</sub> H <sub>5</sub> | 2.02    | 2.02 | 2.04 | 2.03                                  | 2.26                                          | 97.2                              | 96.4    | 105.6   | 99.7                                          |                                         |
| TS2 or TS3b                                                    | 2.11    | 2.01 | 2.01 | 2.04                                  | 2.35                                          | 102.2                             | 93.2    | 93.2    | 96.2                                          | 10.2                                    |
| ZrC <sub>4</sub> H <sub>9</sub>                                | 2.02    | 2.02 | 2.02 | 2.02                                  | 2.23                                          | 100.8                             | 101.9   | 100.5   | 101.1                                         |                                         |
| TS3a_Zr                                                        | 2.06    | 2.02 | 2.01 | 2.03                                  | 1.95                                          | 105.5                             | 94.5    | 94.1    | 98.0                                          | 12.4                                    |
| C <sub>4</sub> H <sub>8</sub> -ZrH                             | 2.02    | 2.03 | 2.01 | 2.02                                  | 1.89                                          | 104.2                             | 95.7    | 96.4    | 98.8                                          |                                         |
| C <sub>2</sub> H <sub>4</sub> -ZrC <sub>4</sub> H <sub>9</sub> | 2.03    | 2.01 | 2.05 | 2.03                                  | 2.26                                          | 105.5                             | 97.6    | 96.2    | 99.8                                          |                                         |
| TS3c_Zr                                                        | 2.07    | 2.00 | 2.02 | 2.03                                  | 2.42<br>(C of C <sub>4</sub> H <sub>8</sub> ) | 101.3                             | 96.6    | 95.4    | 97.8                                          |                                         |
| C <sub>4</sub> H <sub>8</sub> -ZrC <sub>2</sub> H <sub>5</sub> | 2.03    | 2.01 | 2.04 | 2.03                                  | 2.25                                          | 98.6                              | 98.1    | 103.2   | 100.0                                         |                                         |
| H <sub>2</sub> -ZrC <sub>2</sub> H <sub>5</sub>                | 2.02    | 2.03 | 2.02 | 2.02                                  | 2.25                                          | 99.6                              | 102.3   | 99.6    | 100.5                                         |                                         |
| TS4_Zr                                                         | 2.05    | 2.02 | 2.01 | 2.03                                  | 1.99<br>(H of H <sub>2</sub> )                | 100.5                             | 94.3    | 98.1    | 97.6                                          | 21.7<br>(Zr-H-H-C)                      |
| C <sub>2</sub> H <sub>6</sub> -ZrH                             | 2.01    | 2.0  | 2.0  | 2.0                                   | 1.88                                          | 100.7                             | 100.2   | 99.9    | 100.3                                         |                                         |

**Table S13:** PBE computed ( $E^{DFT}$ ) and zero-point ( $E^{ZPE}$ ) energies of 3-3mr ( $\equiv\text{SiO}$ )<sub>3</sub>ZrH intermediates.

| M = Zr                                                                            | 3-3mr (SiO) <sub>3</sub> ZrH |                |
|-----------------------------------------------------------------------------------|------------------------------|----------------|
|                                                                                   | $E^{DFT}$ (eV)               | $E^{ZPE}$ (eV) |
| (SiO) <sub>3</sub> MH (clean)                                                     | -510.525                     | 0.484          |
| C <sub>2</sub> H <sub>4</sub> --MH(SiO) <sub>3</sub>                              | -542.872                     | 1.892          |
| TS(1)                                                                             | -542.730                     | 1.887          |
| (SiO) <sub>3</sub> MC <sub>2</sub> H <sub>5</sub>                                 | -544.006                     | 1.993          |
| C <sub>2</sub> H <sub>4</sub> --MC <sub>2</sub> H <sub>5</sub> (SiO) <sub>3</sub> | -576.151                     | 3.399          |
| TS(2) or TS(3b)                                                                   | -575.539                     | 3.444          |
| (SiO) <sub>3</sub> MC <sub>4</sub> H <sub>9</sub>                                 | -577.098                     | 3.512          |
| TS(3a)                                                                            | -575.800                     | 3.385          |
| C <sub>4</sub> H <sub>8</sub> --MH(SiO) <sub>3</sub>                              | -576.008                     | 3.393          |
| C <sub>2</sub> H <sub>4</sub> --MC <sub>4</sub> H <sub>9</sub> (SiO) <sub>3</sub> | -609.258                     | 4.917          |
| TS(3c)                                                                            | -608.057                     | 4.825          |
| C <sub>4</sub> H <sub>8</sub> -MC <sub>2</sub> H <sub>5</sub> (SiO) <sub>3</sub>  | -609.290                     | 4.898          |
| H <sub>2</sub> --MC <sub>2</sub> H <sub>5</sub>                                   | -550.821                     | 2.348          |
| TS(4)                                                                             | -550.112                     | 2.383          |
| MH--C <sub>2</sub> H <sub>6</sub>                                                 | -551.061                     | 2.478          |
| Bim-TS(3a)                                                                        | -607.976                     | 4.788          |
| TS(3d)                                                                            | -608.101                     | 4.819          |
| ZrC <sub>2</sub> H <sub>3</sub>                                                   | -535.719                     | 1.401          |

**Table S14:** ZPE corrected reactions energies ( $dE$ ) and activation energies ( $E_a$ ) in eV for ethylene dimerization on 3-3mr ( $\equiv\text{SiO}$ )<sub>3</sub>Zr(H) site on reconstructed silica. Physisorption denoted by “\*”. For non-activated adsorption, barriers are assumed to be 0

| No. | Reactions                                                                                                                         | Zr    |       |
|-----|-----------------------------------------------------------------------------------------------------------------------------------|-------|-------|
|     |                                                                                                                                   | $E_a$ | $dE$  |
| 1*  | C <sub>2</sub> H <sub>4</sub> + MH → C <sub>2</sub> H <sub>4</sub> --MH                                                           | 0     | -0.33 |
| 1   | C <sub>2</sub> H <sub>4</sub> --MH → MC <sub>2</sub> H <sub>5</sub>                                                               | 0.14  | -1.03 |
| 2*  | C <sub>2</sub> H <sub>4</sub> + MC <sub>2</sub> H <sub>5</sub> → C <sub>2</sub> H <sub>4</sub> --MC <sub>2</sub> H <sub>5</sub>   | 0     | -0.13 |
| 2   | C <sub>2</sub> H <sub>4</sub> --MC <sub>2</sub> H <sub>5</sub> → MC <sub>4</sub> H <sub>9</sub>                                   | 0.66  | -0.83 |
| 3a  | MC <sub>4</sub> H <sub>9</sub> → C <sub>4</sub> H <sub>8</sub> --MH                                                               | 1.17  | 0.97  |
| 3a* | C <sub>4</sub> H <sub>8</sub> --MH → 1-C <sub>4</sub> H <sub>8</sub> + MH                                                         | 0     | 0.27  |
| 3c* | C <sub>2</sub> H <sub>4</sub> + MC <sub>4</sub> H <sub>9</sub> → C <sub>2</sub> H <sub>4</sub> --MC <sub>4</sub> H <sub>9</sub>   | 0     | -0.14 |
| 3c  | C <sub>2</sub> H <sub>4</sub> --MC <sub>4</sub> H <sub>9</sub> → MC <sub>2</sub> H <sub>5</sub> + 1-C <sub>4</sub> H <sub>8</sub> | 1.11  | -0.05 |
| 3d  | C <sub>2</sub> H <sub>4</sub> --MC <sub>4</sub> H <sub>9</sub> → MC <sub>2</sub> H <sub>3</sub> + C <sub>4</sub> H <sub>10</sub>  | 1.06  | -0.01 |
| 4   | H <sub>2</sub> + MC <sub>2</sub> H <sub>5</sub> → HM + C <sub>2</sub> H <sub>6</sub>                                              | 0.77  | -0.06 |

### 3-3mr transition state distortions

We compared the C-C bond formation from M-C insertion and  $\beta$ -H termination barriers for the 3-4mr and 3-3mr ( $\equiv\text{SiO}$ )<sub>3</sub>ZrH sites in Fig. 8b. Barriers are lower on the latter site, and the effect is more significant for the C-C bond formation via M-C insertion reaction. Greater H-M-O angles at the more strained 3-3mr site are consistent with more ready access of ethylene. Similar, smaller average distortion  $\langle a \rangle$  at the transition state is consistent with lower barriers.

**Table S15:** Structural parameters of species formed on 3-4mr and 3-3mr ( $\equiv\text{SiO}$ )<sub>3</sub>ZrH site on as-cleaved and reconstructed silica (111), respectively. Bond distances in angstroms (Å) and angles ( $\angle$ ) in degrees ( $^\circ$ )

| Species                                                                             | 3-4mr                              |          |          |                                             | 3-3mr                              |          |          |                                             |
|-------------------------------------------------------------------------------------|------------------------------------|----------|----------|---------------------------------------------|------------------------------------|----------|----------|---------------------------------------------|
|                                                                                     | $\angle\text{Si-O-M}$ ( $^\circ$ ) |          |          | $\overline{\angle\text{SiOM}}$ ( $^\circ$ ) | $\angle\text{Si-O-M}$ ( $^\circ$ ) |          |          | $\overline{\angle\text{SiOM}}$ ( $^\circ$ ) |
|                                                                                     | Si1-O1-M                           | Si2-O2-M | Si3-O3-M |                                             | Si1-O1-M                           | Si2-O2-M | Si3-O3-M |                                             |
| Zr-H                                                                                | 141.8                              | 141      | 139.1    | 140.6                                       | 113.2                              | 113.3    | 113.2    | 113.2                                       |
| TS1_Zr                                                                              | 144.8                              | 144.2    | 140.7    | 143.2                                       | 116.7                              | 114.1    | 113.8    | 114.9                                       |
| ZrC <sub>2</sub> H <sub>5</sub> (2)                                                 | 138.8                              | 134.8    | 142.6    | 138.7                                       | 112.0                              | 111.9    | 112.9    | 112.3                                       |
| TS2_Zr                                                                              | 163.6                              | 138.6    | 138.3    | 146.8                                       | 117.5                              | 116.9    | 116.2    | 116.9                                       |
| ZrC <sub>4</sub> H <sub>9</sub> (4)                                                 | 140.2                              | 138.1    | 140.0    | 139.4                                       | 111.8                              | 111.9    | 112.7    | 112.1                                       |
| TS3a_Zr                                                                             | 147.3                              | 141.4    | 141.2    | 143.9                                       | 113.8                              | 117.4    | 114.3    | 115.2                                       |
| <b>Average Induced Strain, <math>\langle a \rangle</math> (<math>^\circ</math>)</b> |                                    |          |          |                                             |                                    |          |          |                                             |
| Zr: ZrH $\rightarrow$ TS1                                                           | $143.2 - 140.6 = 2.6$              |          |          |                                             | $114.9 - 113.2 = 1.7$              |          |          |                                             |
| Zr: 2 $\rightarrow$ TS2                                                             | $146.8 - 139.2 = 8.1$              |          |          |                                             | $112.3 - 116.9 = 4.6$              |          |          |                                             |
| Zr: 4 $\rightarrow$ TS3a                                                            | $143.9 - 139.4 = 4.5$              |          |          |                                             | $115.2 - 112.1 = 3.1$              |          |          |                                             |

### 3-3mr microkinetic model

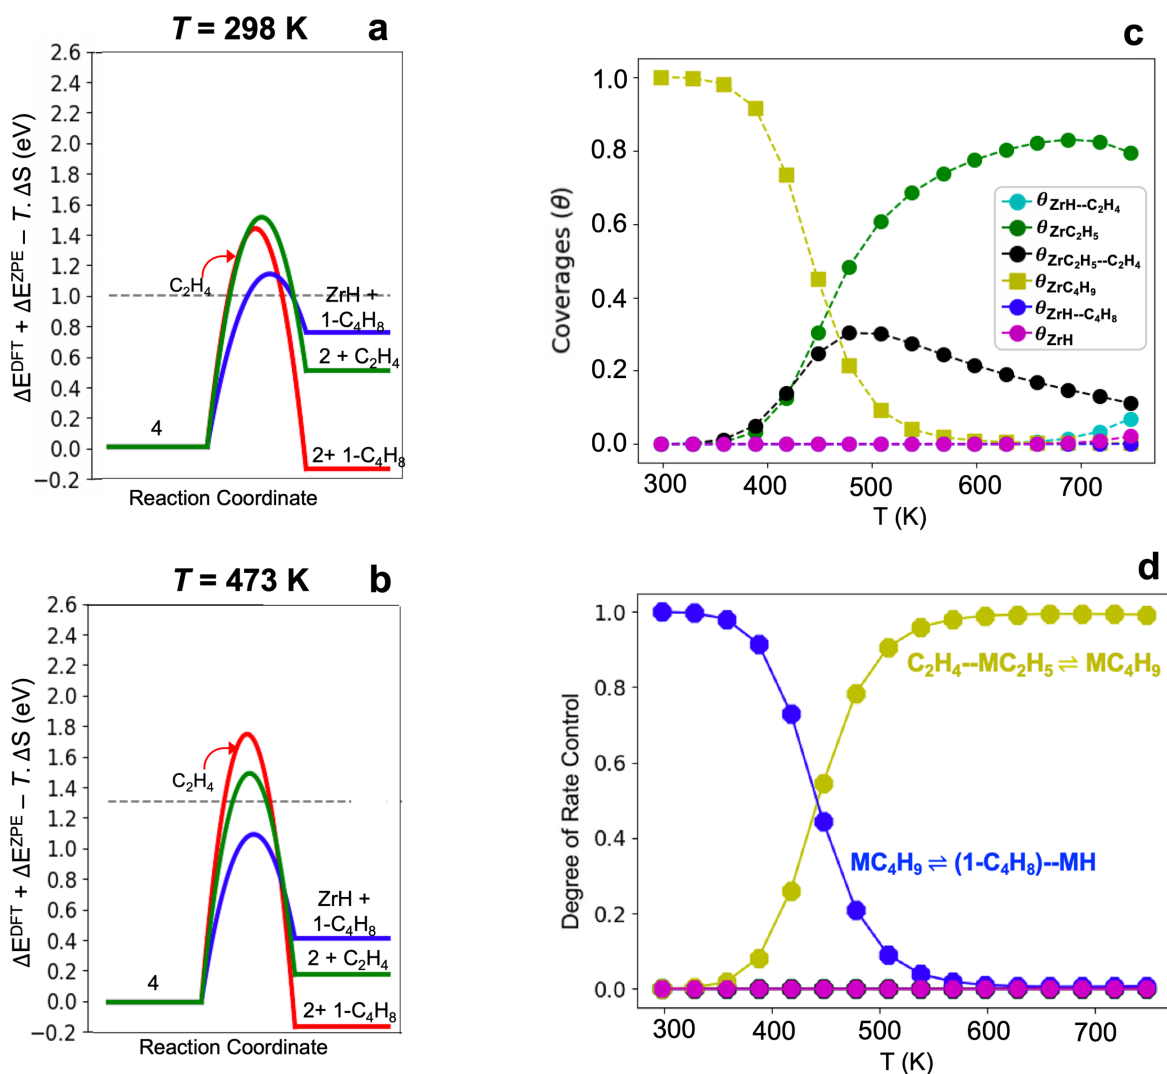

**Fig. S18:** (a,b) Termination vs oligomerization free energy surfaces at 3-3mr (SiO)<sub>3</sub>ZrH site at 298 and 473 K and 1 bar ethylene. Termination routes color coded as in Fig. 4; (c) Steady state coverages vs temperature at  $P_{\text{C}_2\text{H}_4} = 17$  bar (d) Degree of rate control at  $P_{\text{C}_2\text{H}_4} = 17$  bar. Reactions color-coded as in Fig. S11.

**Table S16:** (top) Activation energies for chain growth via TS(2) and termination via TS(3a), bim-TS(3a), TS(3b), TS(3c) and TS(3d) for 3-3mr (SiO)<sub>3</sub>ZrH site at T = 0 K, 298 K and 473 K. (bottom) Consequences of various termination routes on computed  $\bar{P}_n$  at low and high ethylene pressure ( $P_{C_2H_4}$ ).

| Reactions                                                                                                                                                                                             | $\Delta E^\ddagger$ (eV) | $\Delta G^\ddagger, 298K$ (eV) |                          | $\Delta G^\ddagger, 473K$ (eV) |                          |
|-------------------------------------------------------------------------------------------------------------------------------------------------------------------------------------------------------|--------------------------|--------------------------------|--------------------------|--------------------------------|--------------------------|
| $C_2H_4 + MC_2H_5 \rightarrow TS(2)$                                                                                                                                                                  | 0.53                     | 0.994                          |                          | 1.314                          |                          |
| $MC_4H_9 \rightarrow TS(3a)$                                                                                                                                                                          | 1.172                    | 1.172                          |                          | 1.172                          |                          |
| $C_2H_4 + MC_4H_9 \rightarrow \text{bim-TS}(3a)$                                                                                                                                                      | 1.01                     | 1.474                          |                          | 1.794                          |                          |
| $C_2H_4 + MC_4H_9 \rightarrow TS(3c)$                                                                                                                                                                 | 0.966                    | 1.43                           |                          | 1.75                           |                          |
| $MC_4H_9 \rightarrow TS(3b)$                                                                                                                                                                          | 1.492                    | 1.492                          |                          | 1.492                          |                          |
| $C_2H_4 + MC_4H_9 \rightarrow TS(3d)$                                                                                                                                                                 | 0.915                    | 1.379                          |                          | 1.70                           |                          |
|                                                                                                                                                                                                       |                          | $\bar{P}_n$                    |                          | $\bar{P}_n$                    |                          |
| $\bar{P}_n$ Expressions                                                                                                                                                                               |                          | $P_{C_2H_4} = 0.27$<br>bar     | $P_{C_2H_4} = 17$<br>bar | $P_{C_2H_4} = 0.27$<br>bar     | $P_{C_2H_4} = 17$<br>bar |
| $\bar{P}_n = 1 + \frac{k_{CC}}{k_{term}} P_{C_2H_4}$<br>Where $k_{term} = k_{TS(3a)}$                                                                                                                 | -                        | 277                            | $1.74 \times 10^4$       | 1.01                           | 1.52                     |
| $\bar{P}_n = 1 + \frac{k_{CC}}{k_{term}} P_{C_2H_4}$<br>where $k_{term} = k_{TS(3a)} + k_{TS(3b)} +$<br>$P_{C_2H_4} \cdot k_{TS(3c)} + P_{C_2H_4} k_{\text{bim-TS}(3a)} +$<br>$P_{C_2H_4} k_{TS(3d)}$ | -                        | 277                            | $1.73 \times 10^4$       | 1.01                           | 1.52                     |

†  $k_{TS(3a)}, k_{TS(3b)}, k_{TS(3c)}, k_{TS(3d)}, k_{\text{bim-TS}(3a)}$  are rate constant for different chain termination processes.  $k_{CC}$  is chain growth rate constant.  $\Delta E^\ddagger$  is ZPE corrected DFT energy barrier and  $\Delta G^\ddagger$  is free energy barriers at a given temperature



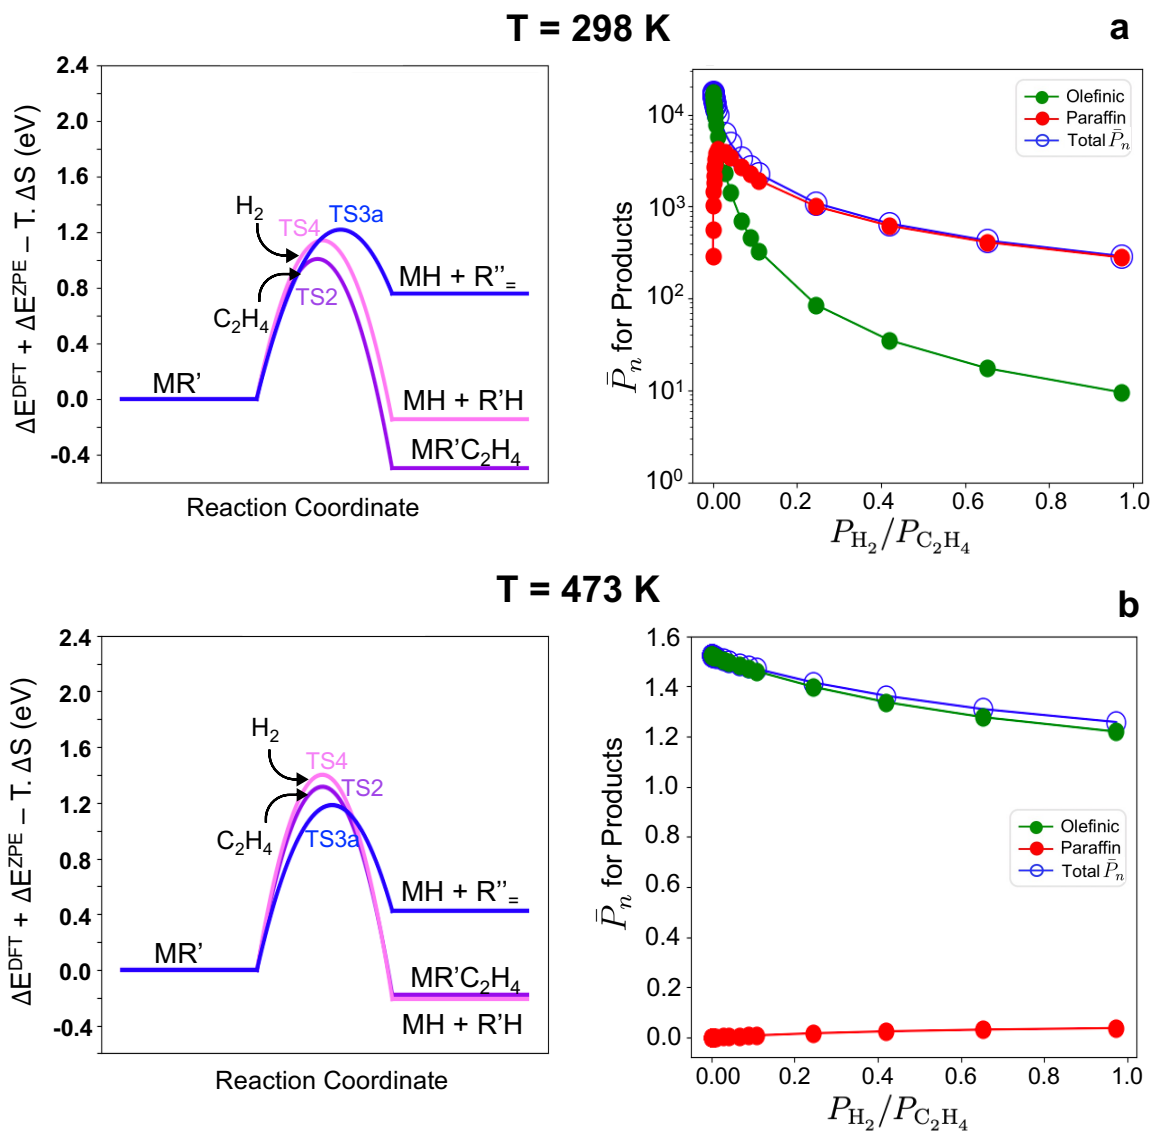

**Fig. S19:** Free energy profiles for the 3-3mr Zr-alkyl (MR') surface site along and corresponding  $\bar{P}_n$  changes with  $P_{H_2}/P_{C_2H_4}$  from 0 to 1 at **a)**  $T = 298$  K **b)**  $T = 473$  K for **1)** M-C insertion upon ethylene coordination via TS(2), **2)** hydrogenolysis upon hydrogen addition via TS(4), **3)** termination by  $\beta$ -H transfer to M via (TS3a) to olefin (R''=).

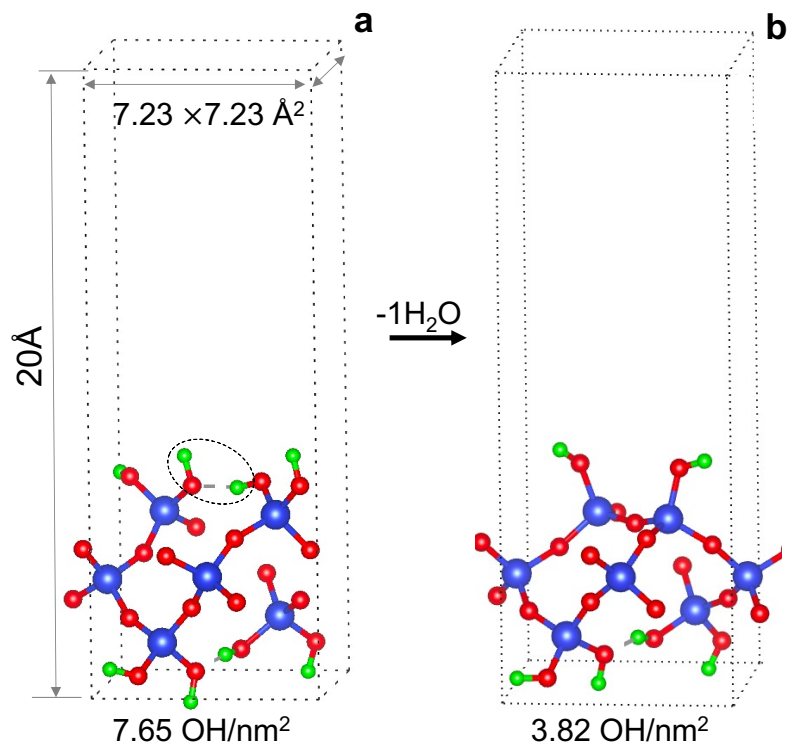

**Fig. S20:** **a)** (001) silica surface with geminal silanols and two Si-OHs that are condensed are circled **b)** Dehydroxylated (001) silica surface having the new Si-O-Si bond between the two silanols left on top.

## Grafting and hydrogenolysis of $M(\text{CH}_3)_4$ to 1-3mr site

Grafting of  $M(\text{CH}_3)_4$  on silanols of dehydroxylated (001) silica surface (Fig. S20b) is performed as per reaction (s1) to form  $(\equiv\text{SiO})_n\text{M}(\text{CH}_3)_{4-n}$  species on surface, where  $n=1, 2$  and their further transformation to hydrides occurs as per reactions (s2). Thermodynamics of sequential grafted complexes of  $\text{Zr}(\text{CH}_3)_4$  and their hydrogenation is shown in Fig. S21a, while Fig. S21b compares heats of grafting ( $\Delta E_{rxn}^{DFT}$ ) of  $M(\text{CH}_3)_4$  on the (001) silica against  $(\equiv\text{SiO})_n\text{Zr}(\text{CH}_3)_{4-n}$  on (111) silica. Grafting is exothermic for all species. Structural energies are in Table S17 and reaction energies in Table S18. Structures of  $(\equiv\text{SiO})_n\text{M}(\text{CH}_3)_{4-n}$ , and  $(\equiv\text{SiO})_n\text{M}(\text{H})_{4-n}$  are in Fig. S22 in the top row and bottom row, respectively.

A non-periodic trend is visible in hydrogenolysis energies on (001) facet (Table S18), alike that on silica (111) surface (Table S3).

**Table S17:** PBE computed energies  $E^{DFT}$  (without ZPE correction) in eV for structures in grafting and hydrogenolysis process on dehydroxylated (001) silica shown in Fig. S20b

| Species                                       | n | $E^{DFT}$ (eV) |          |          |
|-----------------------------------------------|---|----------------|----------|----------|
|                                               |   | Ti             | Zr       | Hf       |
| $(\equiv\text{SiO})\text{M}(\text{CH}_3)_3$   | 1 | -250.038       | -251.087 | -252.992 |
| $(\equiv\text{SiO})_2\text{M}(\text{CH}_3)_2$ | 2 | -227.693       | -228.708 | -230.717 |
| $(\equiv\text{SiO})\text{M}(\text{H})_3$      | 1 | -198.590       | -200.019 | -201.891 |
| $(\equiv\text{SiO})_2\text{M}(\text{H})_2$    | 2 | -193.448       | -194.584 | -196.561 |
| Clean dehydroxylated (001) silica             | - | -185.500       |          |          |

**Table S18:** DFT computed heats of grafting  $M(\text{CH}_3)_4$  on dehydroxylated silica (001) surface using energies (in eV) from Table S17

| M  | Grafting $M(\text{CH}_3)_4$ on silica (001) |       | Hydrogenolysis of grafted $(\text{SiO})_nM(\text{CH}_3)_{4-n}$ |       |
|----|---------------------------------------------|-------|----------------------------------------------------------------|-------|
|    | Calculated by reaction (s1)                 |       | Calculated by reaction (s2)                                    |       |
|    | n=1                                         | n=2   | n=1                                                            | n=2   |
| Ti | -2.03                                       | -3.71 | -0.37                                                          | -0.30 |
| Zr | -2.16                                       | -3.81 | -0.74                                                          | -0.42 |
| Hf | -2.20                                       | -3.96 | -0.71                                                          | -0.39 |

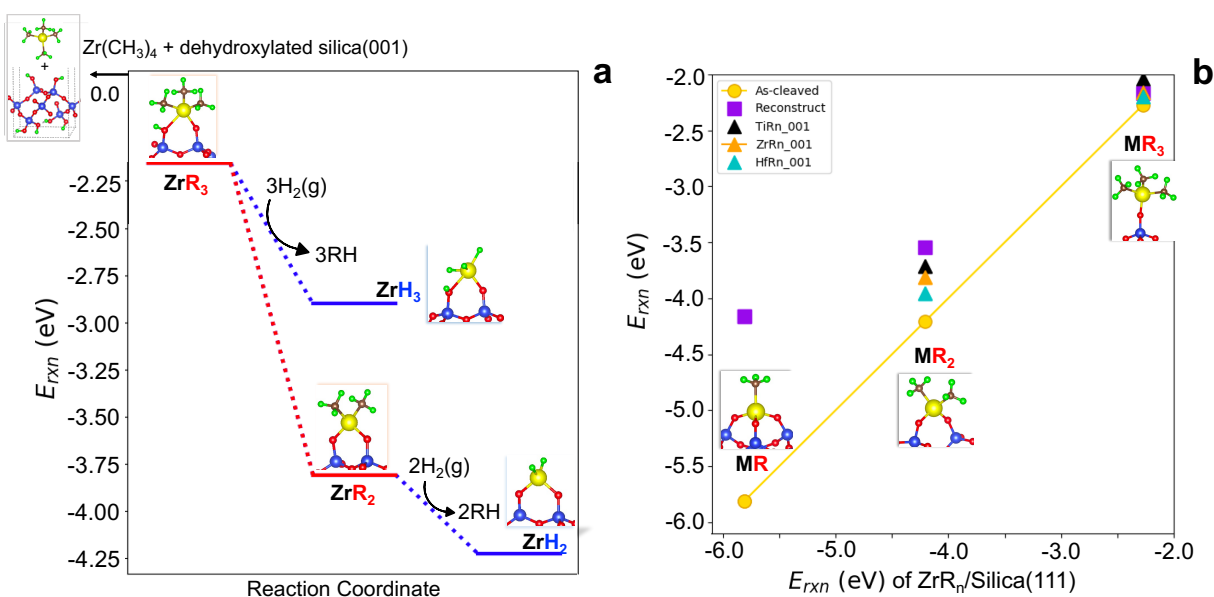

**Fig. S21:** a) Heats of formation of  $(\equiv\text{SiO})_n\text{Zr}(\text{CH}_3)_{4-n}$  ( $R = \text{CH}_3$ ) and hydrogenolysis to  $(\equiv\text{SiO})_n\text{Zr}(\text{H})_{4-n}$  [ $n=1,2$ ] on dehydroxylated (001) silica b) Parity plot comparing heats of formation of  $(\equiv\text{SiO})_nM(\text{CH}_3)_{4-n}$  for Ti, Zr and Hf [ $n= 1, 2$ ] on dehydroxylated silica (001) against  $(\equiv\text{SiO})_n\text{Zr}(\text{CH}_3)_{4-n}$  on as-cleaved silica (111) [ $n = 1,2,3$ ]. Energies of  $(\equiv\text{SiO})_n\text{Zr}(\text{CH}_3)_{4-n}$  on reconstructed silica also shown.

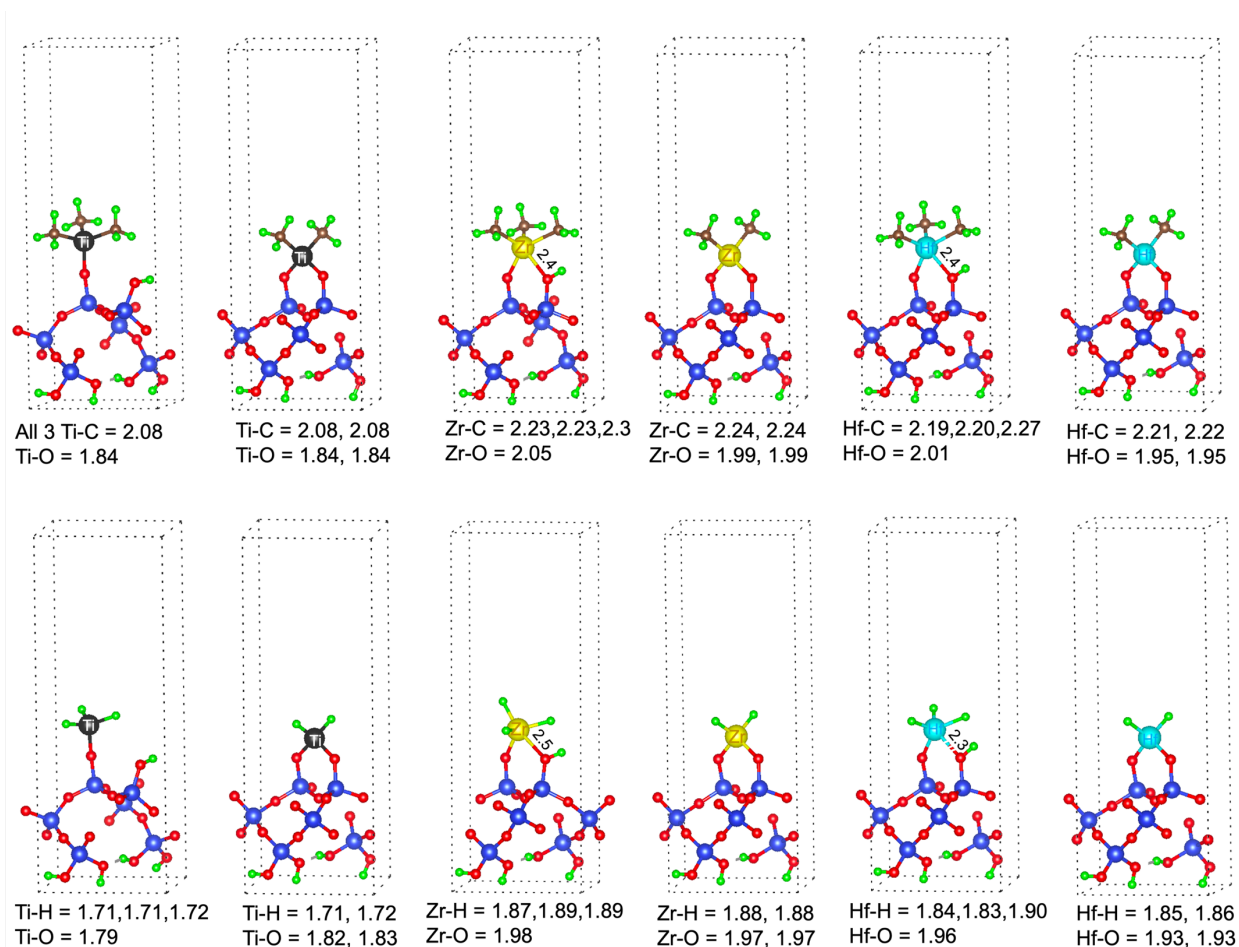

**Fig. S22:** Structures of  $(\equiv\text{SiO})_n\text{M}(\text{CH}_3)_{4-n}$  in top row and  $(\equiv\text{SiO})_n\text{M}(\text{H})_{4-n}$  in bottom for Ti, Zr and Hf from left to right on dehydroxylated silica (001). H: green, C: brown, Si: blue, O: red. Distances in Å.

## 1-3mr oligomerization intermediates and reactions

**Table S19:** PBE computed energies ( $E^{\text{DFT}}$ , without ZPE correction) and zero-point energy ( $E^{\text{ZPE}}$ ) correction in eV for different species on  $(\equiv\text{SiO})_2\text{MH}_2$  on silica (001)

|                                                                          | $(\equiv\text{SiO})_2\text{TiH}_2$ |                  | $(\equiv\text{SiO})_2\text{ZrH}_2$ |                  | $(\equiv\text{SiO})_2\text{HfH}_2$ |                  |
|--------------------------------------------------------------------------|------------------------------------|------------------|------------------------------------|------------------|------------------------------------|------------------|
|                                                                          | $E^{\text{DFT}}$                   | $E^{\text{ZPE}}$ | $E^{\text{DFT}}$                   | $E^{\text{ZPE}}$ | $E^{\text{DFT}}$                   | $E^{\text{ZPE}}$ |
| $(\text{SiO})_2\text{MH}_2$ (clean)                                      | -193.438                           | 0.387            | -194.549                           | 0.353            | -196.528                           | 0.357            |
| $\text{C}_2\text{H}_4\text{--}(\text{SiO})_2\text{MH}_2$                 | -225.732                           | 1.812            | -227.079                           | 1.791            | -228.991                           | 1.800            |
| $(\text{SiO})_2\text{MH}(\text{C}_2\text{H}_5)$                          | -227.156                           | 1.911            | -228.210                           | 1.876            | -230.123                           | 1.873            |
| $\text{C}_2\text{H}_4\text{--MH}(\text{C}_2\text{H}_5)(\text{SiO})_2$    | -259.271                           | 3.327            | -260.495                           | 3.285            | -262.402                           | 3.285            |
| TS(1')                                                                   | -259.186                           | 3.340            | -260.406                           | 3.291            | -262.249                           | 3.293            |
| $(\text{SiO})_2\text{M}(\text{C}_2\text{H}_5)_2$                         | -260.548                           | 3.418            | -261.494                           | 3.396            | -263.443                           | 3.387            |
| $\text{C}_2\text{H}_4\text{--M}(\text{C}_2\text{H}_5)_2(\text{SiO})_2$   | -292.592                           | 4.805            | -293.527                           | 4.829            | -295.467                           | 4.771            |
| TS(2')                                                                   | -291.916                           | 4.916            | -293.219                           | 4.868            | -295.031                           | 4.860            |
| $(\text{SiO})_2\text{M}(\text{C}_2\text{H}_5)(\text{C}_4\text{H}_9)$     | -293.743                           | 4.949            | -294.707                           | 4.909            | -296.656                           | 4.914            |
| TS(3'a)                                                                  | -292.322                           | 4.829            | -293.547                           | 4.788            | -295.402                           | 4.787            |
| $(1\text{-C}_4\text{H}_8)\text{--M}(\text{C}_2\text{H}_5)(\text{SiO})_2$ | -292.448                           | 4.836            | -293.669                           | 4.803            | -295.550                           | 4.798            |

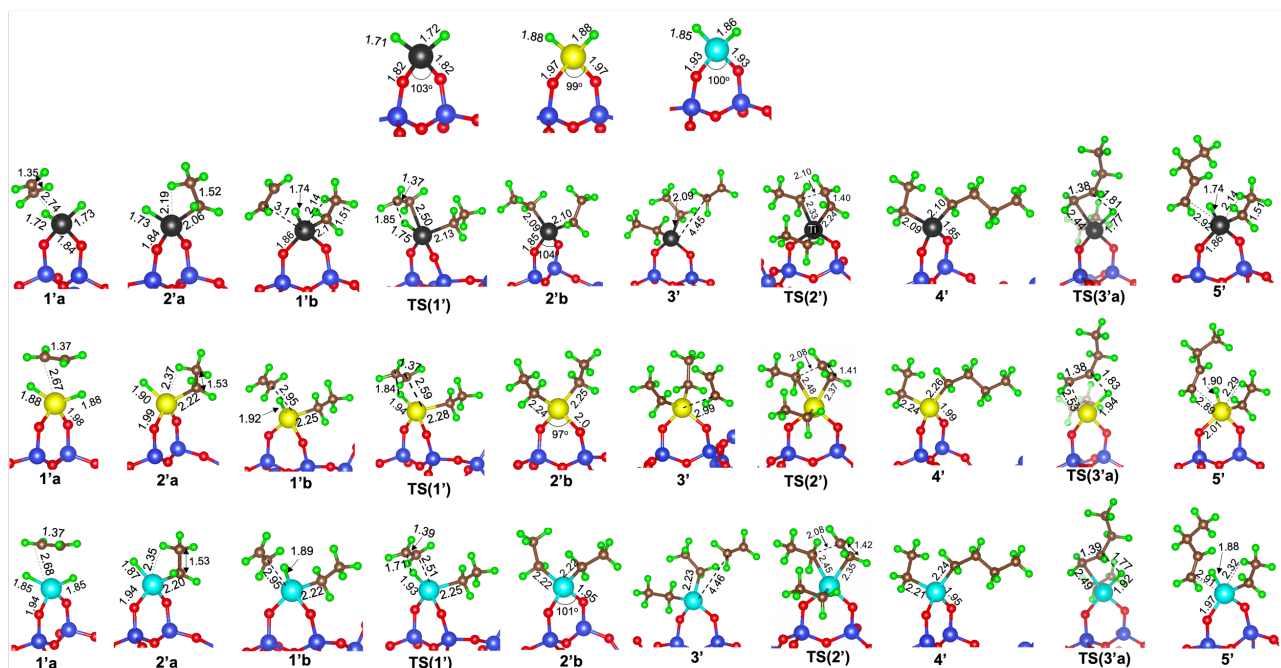

**Fig. S23:** Geometries of species along the catalytic cycle on  $(\equiv\text{SiO})_2\text{MH}_2$  site [ $\text{M} = \text{Ti}, \text{Zr}, \text{Hf}$ ] on dehydroxylated (001) silica. Top row shows  $(\equiv\text{SiO})_2\text{MH}_2$  site, followed by species for  $(\equiv\text{SiO})_2\text{TiH}_2$ , then by  $(\equiv\text{SiO})_2\text{ZrH}_2$  and last row for  $(\equiv\text{SiO})_2\text{HfH}_2$ . Bond distances in Å. Angles in degrees ( $^\circ$ ). CONTCARS in Zenodo.<sup>11</sup>

**Table S20:** ZPE corrected heats of reactions ( $dE$ ) in eV for ethylene dimerization on  $(\equiv\text{SiO})_2\text{M}(\text{H})_2$ . The barrier ( $E_a$ ) is the energy differences between transition state and initial state at infinite separation. If a value is negative, we treat it as barrierless. For non-activated adsorption, the barriers are assumed to be 0

| No. | Reactions                                                                                                                    | Ti    |       | Zr    |       | Hf    |       |
|-----|------------------------------------------------------------------------------------------------------------------------------|-------|-------|-------|-------|-------|-------|
|     |                                                                                                                              | $E_a$ | $dE$  | $E_a$ | $dE$  | $E_a$ | $dE$  |
| 1*  | $\text{C}_2\text{H}_4 + \text{MH}_2 \rightarrow \text{C}_2\text{H}_4\text{--M}(\text{H})_2$                                  | 0.0   | -0.26 | 0.0   | -0.48 | 0.0   | -0.41 |
| 2   | $\text{C}_2\text{H}_4\text{--M}(\text{H})_2 \rightarrow \text{MH}(\text{C}_2\text{H}_5)$                                     | 0.0   | -1.33 | 0.0   | -1.05 | 0.0   | -1.06 |
| 3*  | $\text{C}_2\text{H}_4 + \text{MH}(\text{C}_2\text{H}_5) \rightarrow \text{C}_2\text{H}_4\text{--MH}(\text{C}_2\text{H}_5)$   | 0.0   | -0.09 | 0.0   | -0.27 | 0.0   | -0.26 |
| 4   | $\text{C}_2\text{H}_4\text{--MH}(\text{C}_2\text{H}_5) \rightarrow \text{M}(\text{C}_2\text{H}_5)_2$                         | 0.13  | -1.19 | 0.10  | -0.89 | 0.16  | -0.94 |
| 5*  | $\text{C}_2\text{H}_4 + \text{M}(\text{C}_2\text{H}_5)_2 \rightarrow \text{C}_2\text{H}_4\text{--M}(\text{C}_2\text{H}_5)_2$ | 0.0   | -0.05 | 0.0   | 0.01  | 0.0   | -0.03 |
| 6   | $\text{C}_2\text{H}_4\text{--M}(\text{C}_2\text{H}_5)_2 \rightarrow \text{M}(\text{C}_2\text{H}_5)(\text{C}_4\text{H}_9)$    | 0.79  | -1.01 | 0.35  | -1.10 | 0.52  | -1.05 |
| 7   | $\text{M}(\text{C}_2\text{H}_5)(\text{C}_4\text{H}_9) \rightarrow \text{C}_4\text{H}_8\text{--MH}(\text{C}_2\text{H}_5)$     | 1.30  | 1.18  | 1.04  | 0.93  | 1.13  | 0.99  |
| 8*  | $\text{C}_4\text{H}_8\text{--MH}(\text{C}_2\text{H}_5) \rightarrow 1\text{-C}_4\text{H}_8 + \text{MH}(\text{C}_2\text{H}_5)$ | 0.0   | 0.07  | 0.0   | 0.24  | 0.0   | 0.21  |

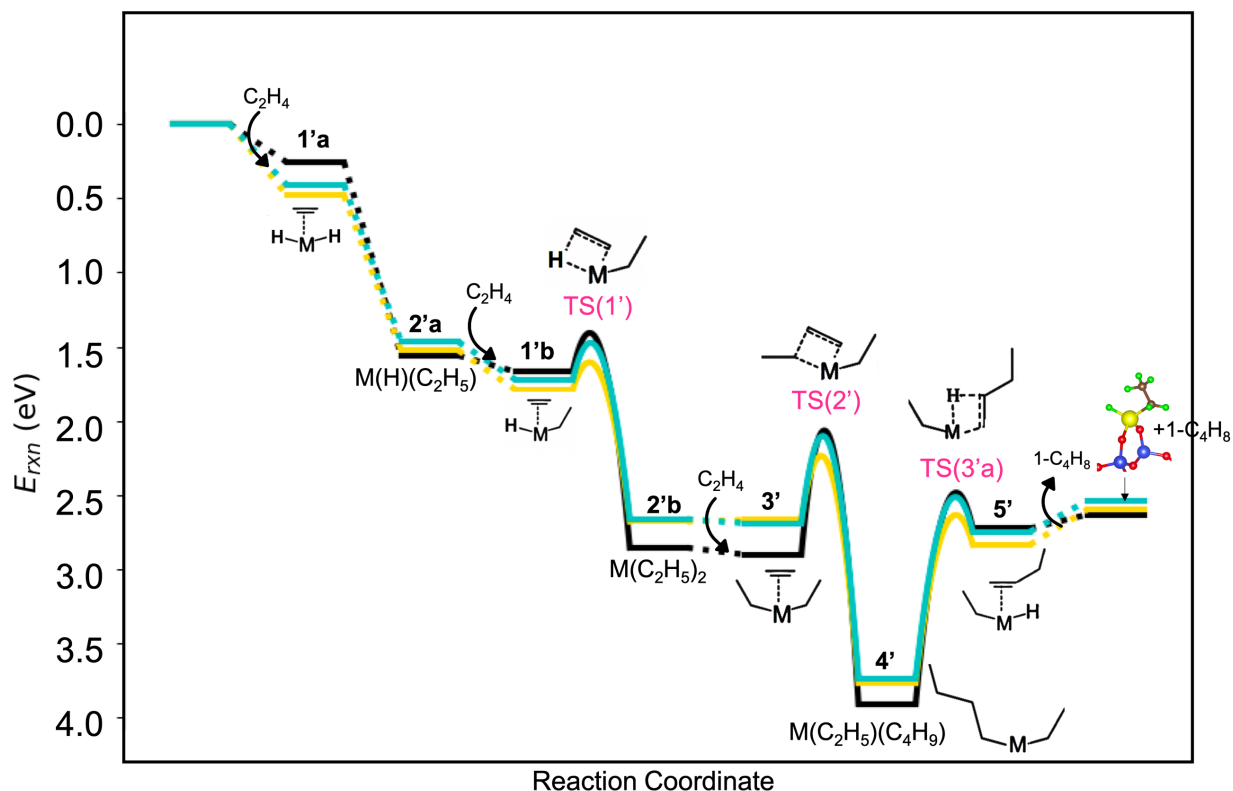

**Fig. S24:** PES for ethylene dimerization mechanism on  $(\equiv\text{SiO})_2\text{M}(\text{H})_2$  grafted on dehydroxylated silica (001),  $\text{M} = \text{Ti}$  (black),  $\text{Zr}$  (yellow) and  $\text{Hf}$  (blue). Energies are referenced to  $1\text{-}3\text{mr}(\equiv\text{SiO})_2\text{M}(\text{H})_2$  site and  $3\text{C}_2\text{H}_4$  gas molecules. Species numbers correspond to catalytic cycle shown in Fig. 11b.

The PES (Fig. S24) is referenced to the dihydride site,  $(\equiv\text{SiO})_2\text{MH}_2$  and ethylene molecules. Ethylene forms a stronger  $\pi$ -complex with  $(\equiv\text{SiO})_2\text{MH}_2$  than with  $(\equiv\text{SiO})_3\text{MH}$ . The first ethylene insertion into M-H bond is exothermic and barrierless as no transition state is located when ethylene approaches the metal vertically downward rather than sideways (CI-NEB for Zr is similar to Hf in Fig. S26, Fig. S27 for Ti). It is further exogenic for ethylene to insert into the second M-H bond of  $(\equiv\text{SiO})_2\text{MH}(\text{C}_2\text{H}_5)$  (**2'a**) and occurs via a four-centered transition state TS(1') (Fig. S23). TS(1') has a tiny barrier as compared to the next step of chain growth on  $(\equiv\text{SiO})_2\text{M}(\text{C}_2\text{H}_5)_2$  (**2'b**) to produce  $(\equiv\text{SiO})_2\text{M}(\text{C}_2\text{H}_5)(\text{C}_4\text{H}_9)$  (**4'**) by M-C insertion of ethylene. The four-centered TS(2') (Fig. S23) shows ethylene conjoining M-ethyl to form the C-C bond approaches much closer to Ti than to Zr and Hf while the non-participating ethyl chain is aligned non-agostically. 1-butene is released from **4'** by endothermic  $\beta$ -H transfer to M via TS(3'a) leaving behind  $(\equiv\text{SiO})_2\text{MH}(\text{C}_2\text{H}_5)$ , **2'a**. The order in energy barriers is  $E_{a,\text{term}} > E_{a,\text{C-C}} > E_{a,\text{M-H}}$  for  $\text{M}(\text{Et})\text{H}$  (Et = ethyl,  $\text{C}_2\text{H}_5$ ) for  $\text{M} = \text{Ti}, \text{Zr}$  and  $\text{Hf}$ , same as that on  $3\text{-}4\text{mr}(\equiv\text{SiO})_3\text{MH}$  sites.

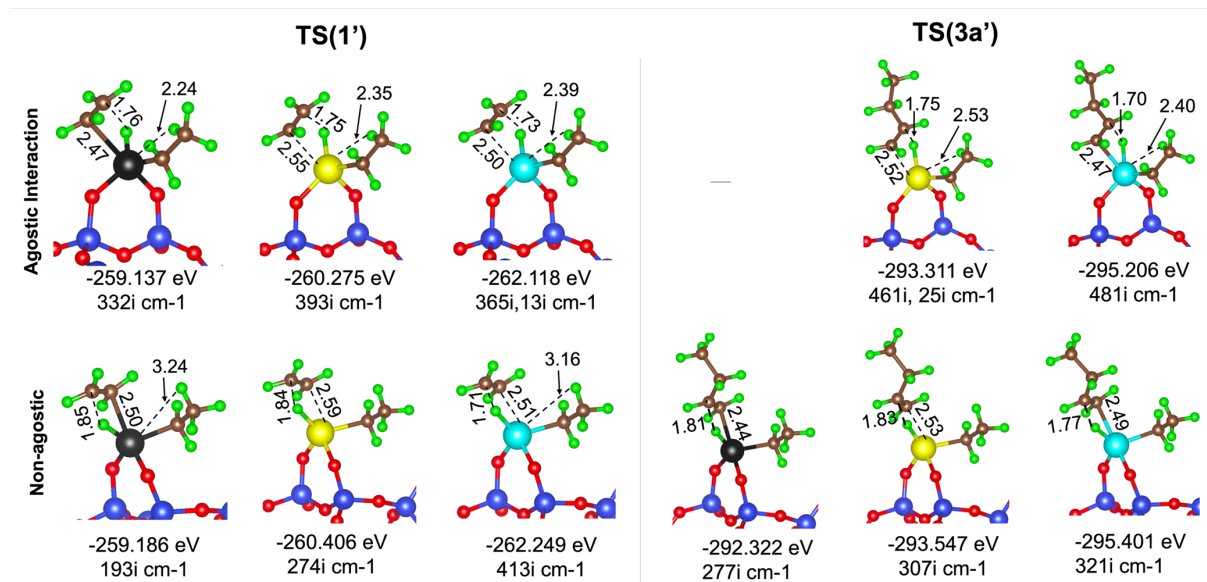

**Fig. S25:** TS(1') and TS(3'a) structures on left and right, respectively, with (top row) and without (bottom) agostic interaction of the side alkyl chain on  $(\equiv\text{SiO})_2\text{MH}_2$  site (M= Ti (black), Zr (yellow), Hf (blue)).  $E^{\text{DFT}}$  energies are lower for non-agostic structures.

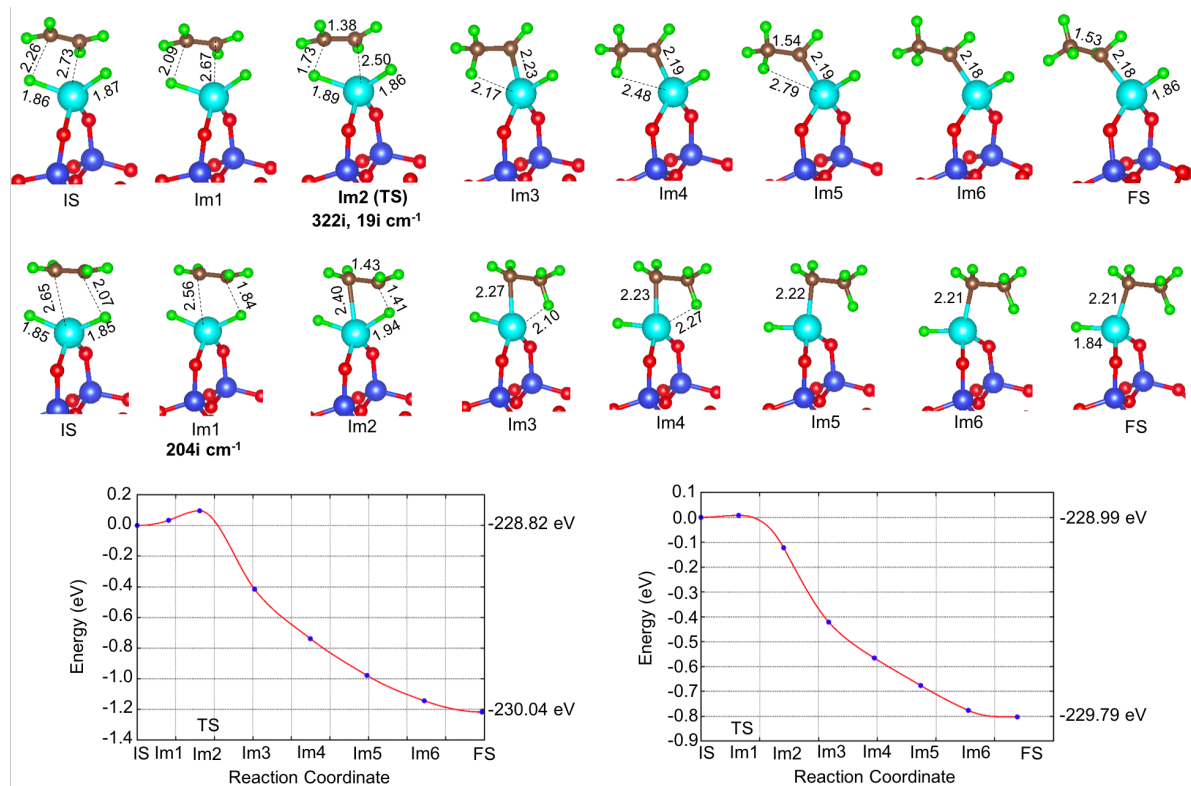

**Fig. S26:** CI-NEB trajectories for insertion of ethylene into Hf-H bond of  $(\equiv\text{SiO})_2\text{HfH}_2$ . Similar trajectories found for this insertion into Zr-H bond of  $(\equiv\text{SiO})_2\text{ZrH}_2$ . Top row shows ethylene coming sideways with energy graph on the left of bottom row. Middle row shows ethylene coming to M ion vertically downward and is zero barrier path from energy plot (right in bottom row). Distances in Å.

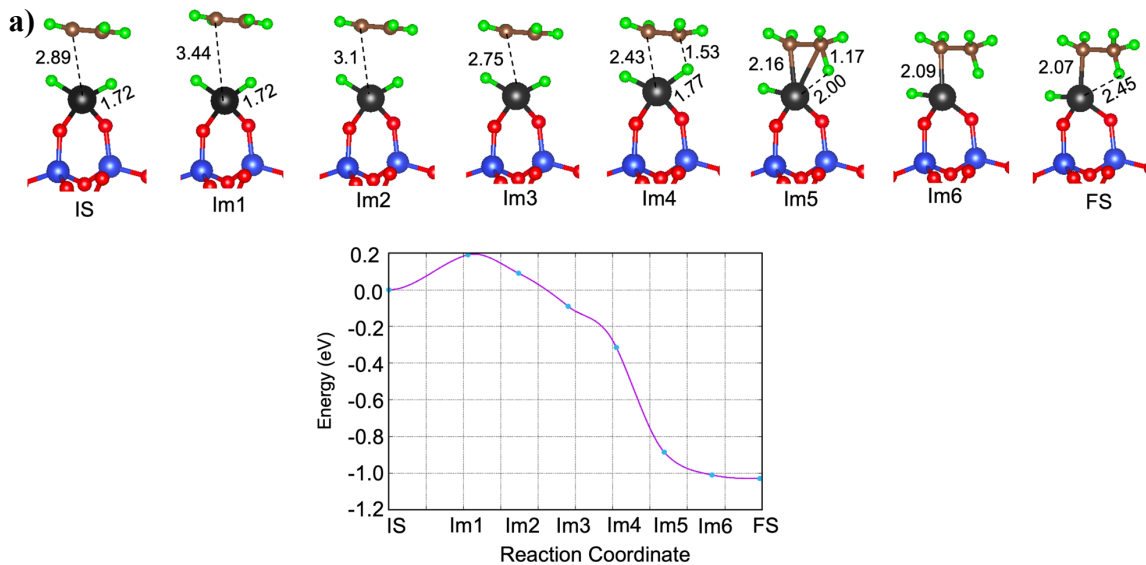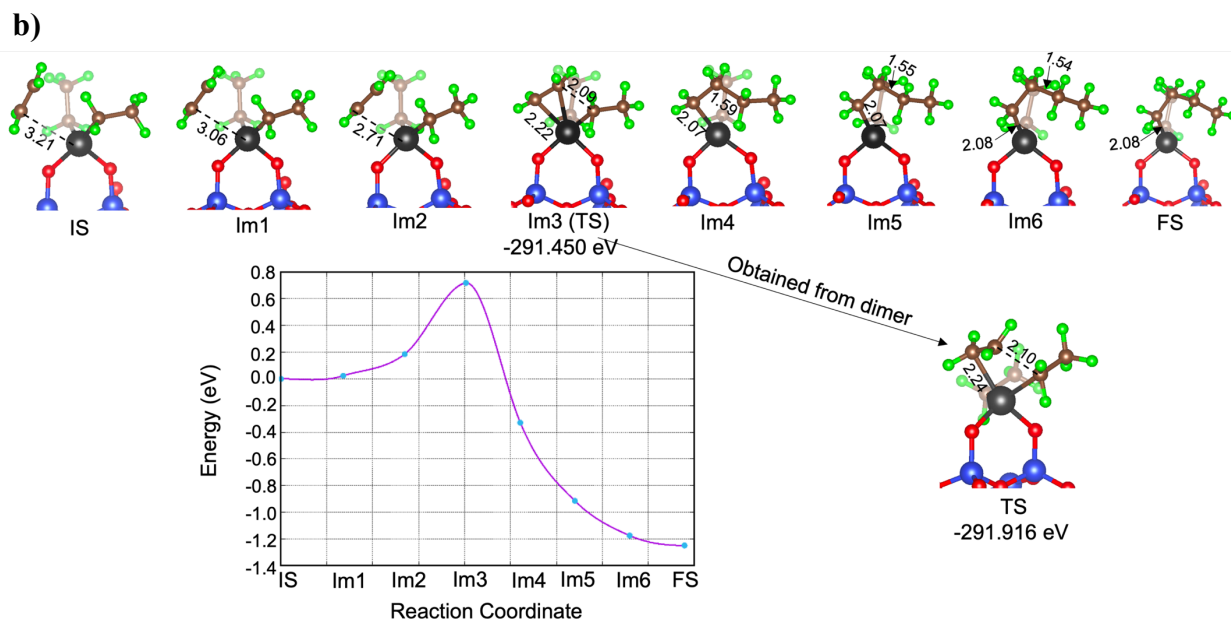



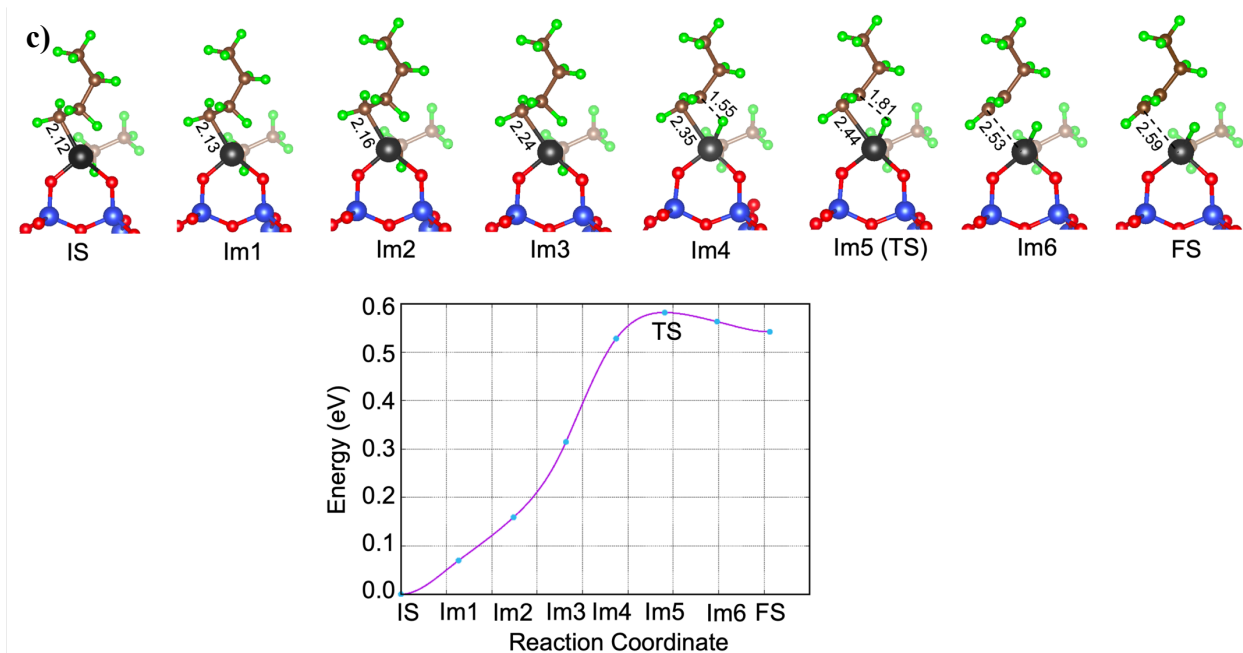

**Fig. S27:** CI-NEB images and energy graph for **a)** insertion of ethylene approaching vertically downward into Ti-H bond of  $(\equiv\text{SiO})_2\text{TiH}_2$  site. No transition state is located for this reaction step. **b)** ethylene insertion on one of the Ti-C bonds of  $(\equiv\text{SiO})_2\text{Ti}(\text{Et})_2$  **c)** Termination by  $\beta$ -H transfer to M yielding 1-butene and  $(\equiv\text{SiO})_2\text{Ti}(\text{H})(\text{Et})$ . Similar trajectories have been used to locate corresponding TSs on Zr and Hf sites. Distances in Å.

## 1-3mr microkinetic models

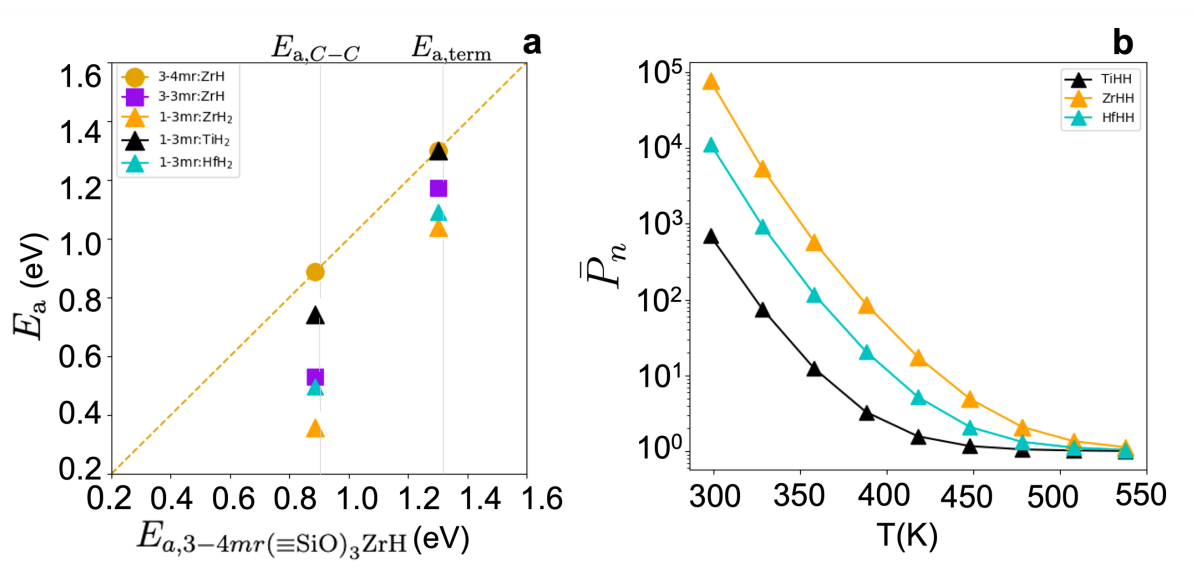

**Fig. S28:** **a)** Parity plot of activation energies of M-C insertion ( $E_{a,C-C}$ ) and  $\beta$ -H termination to M ( $E_{a,term}$ ) on 1-3mr  $(\equiv\text{SiO})_2\text{MH}_2$  (triangles) and 3-3mr  $(\equiv\text{SiO})_3\text{MH}$  (square) against those on 3-4mr  $(\equiv\text{SiO})_3\text{ZrH}$  (circle) sites **b)**  $\bar{P}_n$  on log scale vs temperature at  $P_{\text{C}_2\text{H}_4}=17$  bar for 1-3mr Ti (black), Zr (orange), Hf (blue) sites.

## References

- 1) Wyckoff, R. W. G. *Crystal Structures*, 2<sup>nd</sup> ed., John Wiley & Sons, **1963**, vol. 1, chapter 4, 239.
- 2) Davidson, P. J.; Lappert, M. F.; Pearce, R., *Chem. Rev.*, **1976**, 76, 2, 219-242.
- 3) Larabi, C.; Merle, N.; Norsic, S.; Taoufik, M.; Baudouin, A.; Lucas, C.; Cazat, J. T.; Mallmann, A.; Basset, J. M., *Organometallics*, **2009**, 28, 5647–5655.
- 4) Thieuleux, C.; Quadrelli, E. A.; Basset, J. M.; Döbler, J.; Sauerb, J., *Chem. Commun.*, **2004**, 1729-1731.
- 5) Corker, J.; Lefebvre, F.; Lecuyer, C.; Dufaud, V.; Quignard, F.; Choplin, A.; Evans, J.; Basset, J.M., *J.-M. Science*, **1996**, 271 (5251), 966-969.
- 6) Tosin, G.; Santini, C. C.; Baudouin, A.; Mallman, A. d; Fiddy, S.; Dablemont, C.; and Basset, J.-M., *Organometallics*, **2007**, 26, 17, 4118-4127.
- 7) Lo, D. P.; Ray, W. H., *Ind. Eng. Chem. Res.*, **2005**, 44, 5932-5949.
- 8) Campbell, C. T.; Sellers, J. R.V., *J. Am. Chem. Soc.*, **2012**, 134, 18109–18115.
- 9) Rosier, C.; Niccolai, G. P.; Basset, J.-M., *J. Am. Chem. Soc.* **1997**, 119, 12408-12409.
- 10) Larsen, A. H. *et al. J. Phys.: Condens. Matter*, **2017**, 29, 273002.
- 11) Mehra, N.; Schneider, W. F. <https://doi.org/10.5281/zenodo.11251373>, 2024
